1           **The histone modification reader ZCWPW1 links histone methylation to repair of**  
2                           **PRDM9-induced meiotic double stand breaks**

3

4   Tao Huang<sup>1,2,3,4,5,\*</sup>, Shenli Yuan<sup>7,\*</sup>, Mengjing Li<sup>1,2,3,4,5</sup>, Xiaochen Yu<sup>1,2,3,4,5</sup>, Jianhong Zhang<sup>7</sup>, Yingying  
5   Yin<sup>1,2,3,4,5</sup>, Chao Liu<sup>8</sup>, Lei Gao<sup>7</sup>, Wei Li<sup>8</sup>, Jiang Liu<sup>7,#</sup>, Zi-Jiang Chen<sup>1,2,3,4,5,6,#</sup>, Hongbin Liu<sup>1,2,3,4,5,9,#</sup>

6

7   <sup>1</sup>Center for Reproductive Medicine, Shandong Provincial Hospital Affiliated to Shandong University

8   <sup>2</sup>National Research Center for Assisted Reproductive Technology and Reproductive Genetics, China

9   <sup>3</sup>The Key laboratory of Reproductive Endocrinology (Shandong University), Ministry of Education

10   <sup>4</sup>Shandong Provincial Clinical Medicine Research Center for reproductive health

11   <sup>5</sup>Shandong Provincial Key Laboratory of Reproductive Medicine, No.157 Jingliu Road, Jinan,

12   250001, China

13   <sup>6</sup>Shanghai Key Laboratory for Assisted Reproduction and Reproductive Genetics, Shanghai, China

14   <sup>7</sup>CAS Key Laboratory of Genome Sciences and Information, Beijing Institute of Genomics, Chinese

15   Academy of Sciences, 100101 Beijing, China

16   <sup>8</sup>State Key Laboratory of Stem Cell and Reproductive Biology, Institute of Zoology, Chinese

17   Academy of Sciences, Beijing 100101, China

18   <sup>9</sup>CUHK-SDU Joint Laboratory on Reproductive Genetics, School of Biomedical Sciences, the

19   Chinese University of Hong Kong, Hong Kong, China

20

21   \*These authors contributed equally to this work.

22   #Corresponding: [liuj@big.ac.cn](mailto:liuj@big.ac.cn) (JL); [chenzjiang@hotmail.com](mailto:chenzjiang@hotmail.com) (Z-JC);

23   [hongbin\\_sduivf@aliyun.com](mailto:hongbin_sduivf@aliyun.com) (HBL)

24

25

## 26 **ABSTRACT**

27 It is known that the histone modification writer PRDM9 deposits H3K4me3 and H3K36me3 marks at  
28 future DSB sites very early in meiosis, the nature of any proteins which can read such marks is unknown.  
29 Here, we demonstrate *in vivo* that ZCWPW1 is a H3K4me3 reader and show that its binding at  
30 chromatin promotes completion of DSB repair and synapsis in mouse testes. Based on multiple ChIP-  
31 seq and immunofluorescence analyses with mutants—including an H3K4me3-reader-dead variant of  
32 ZCWPW1 mice line—we establish that ZCWPW1's occupancy on chromatin is strongly but not  
33 exclusively promoted by the histone-modification activity of the PRDM9. ZCWPW1 localizes to  
34 DMC1-labelled DSB hotspots in a largely PRDM9-dependent manner, where it facilitates completion  
35 of synapsis by mediating the DSB repair process. In sum, our study demonstrates the function of a  
36 reader protein that carries out work resulting from an epigenetics-based recombination hotspot selection  
37 system in mammals.

38

## 39 **INTRODUCTION**

40 Meiotic recombination promotes pairing and segregation of homologous chromosomes and disrupts  
41 linkage relationships, thus ensuring faithful genome transmission and increasing genetic diversity  
42 (Handel and Schimenti, 2010; Bolcun-Filas and Schimenti, 2012). At the molecular level, meiotic  
43 recombination is initiated by the induction of programmed DNA double-strand breaks (DSBs) that are  
44 repaired by homologous recombination, leading to gene conversion and crossing over (Hunter, 2015;  
45 Gray and Cohen, 2016; Zickler and Kleckner, 2015). DSB formation is a complex process, and DSB  
46 locations are known to be marked at the very earliest stages of meiosis by trimethylation of histone H3  
47 on lysine 4 (H3K4me3) (de Massy, 2013; Baudat et al., 2013). In mammals, this is accomplished by the  
48 protein PRDM9, which is expressed in the leptotene and zygotene substages (Sun et al., 2015; Parvanov  
49 et al., 2017). PRDM9 is a DNA-binding zinc finger protein—it has a long and highly genetically  
50 variable zinc finger domain which determines its binding specificity (for defining recombination  
51 hotspots), while its SET domain possesses histone trimethyltransferase activity, and its KRAB domain  
52 is involved in protein-protein interactions (Grey et al., 2018; Paigen and Petkov, 2018). In yeast, the

53 histone reader Spp1 links H3K4me3 sites at promoters with the DSB formation machinery, promoting  
54 DSB formation (Sommermeyer et al., 2013; Acquaviva et al., 2013). In mice, although multiple studies  
55 have shown that the H3K4me3 writer PRDM9 controls the locations for DSB formation (Myers et al.,  
56 2010; Parvanov et al., 2010; Baudat et al., 2010; Brick et al., 2012; Powers et al., 2016; Diagouraga et  
57 al., 2018; Grey et al., 2017), much less is known about the subsequent activities of any proteins which  
58 may read these epigenetic marks and thusly help advance the meiotic recombination process (Paigen  
59 and Petkov, 2018).

60 DSBs formation at sites defined by PRDM9 is catalyzed by an evolutionarily conserved  
61 topoisomerase-like enzyme complex consisting of the SPO11 enzyme and its binding partner  
62 TOPOVIBL (Bergerat et al., 1997; Keeney et al., 1997; Robert et al., 2016; Vrielynck et al., 2016;  
63 Panizza et al., 2011). After SPO11-mediated cleavage, there are single-strand overhang sequences  
64 which become coated with a number of proteins including DMC1 and RAD51 (Pittman et al., 1998;  
65 Tarsounas et al., 1999; Dai et al., 2017). The DSBs enable homology searching and alignment to occur,  
66 which in turn promote homology synapsis and DSB repair (Inagaki et al., 2010). The number of DSBs  
67 and the timing of their formation are known to be controlled by intersecting negative feedback circuits.  
68 A basic feature of meiosis is that DSB-mediated interactions and repair processes occur differentially  
69 between homologous nonsister chromatids, rather than between sisters, as occurs in mitotic DSB repair  
70 (Keeney et al., 2014; Lange et al., 2011; Garcia et al., 2015). Some DSBs are repaired in a way that  
71 generates crossovers (COs), wherein DNA is exchanged between homologous chromosomes (Baudat  
72 and de Massy, 2007). The ZMM proteins (*e.g.*, TEX11, MSH4/MSH5, and RNF212) are a group of  
73 functionally related proteins known for their roles in promoting the formation of COs (Kneitz et al.,  
74 2000; Edelman et al., 1999; Yang et al., 2008; Lynn et al., 2007; Reynolds et al., 2013).

75 We previously reported that the zinc finger CW-type and PWWP domain containing 1 (ZCWPW1)  
76 protein is required for meiosis prophase I in mice, and noted that *Zcwpw1* deficiency disrupted  
77 spermatogenesis in male mice but did not disrupt oogenesis in females to the same extent (Li et al.,  
78 2019a). ZCWPW1 is a member of the CW-domain-containing protein family (Perry and Zhao, 2003;  
79 Liu et al., 2016). Its zinc finger CW (zf-CW) domain has three conserved tryptophan and four conserved

80 cysteine residues, and structural analysis has indicated that human ZCWPW1's zf-CW domain is a  
81 histone modification reader (He et al., 2010), while chromatin pulldown analysis has confirmed that  
82 ZCWPW1's zf-CW domain recognizes H3K4me3 marks (Hoppmann et al., 2011). A crystal structure  
83 of the human zf-CW domain of ZCWPW1 in complex with a peptide bearing an H3K4me3 mark  
84 revealed that 4 amino acids largely mediate the H3K4me3 mark binding activity of ZCWPW1's zf-CW  
85 domain: W256, E301, T302, and W303 (He et al., 2010).

86 Here, we found in an immunofluorescence analysis of chromosome spreads from wild type,  
87 *Zcwpw1*<sup>-/-</sup>, and mice expressing an H3K4me3-reader-dead mutant variant of the ZCWPW1 protein, that  
88 ZCWPW1 facilitates meiotic progression in mouse testes. A series of ChIP-seq analyses using  
89 antibodies against ZCWPW1, H3K4me3, and H3K36me3, assessing multiple knockout and knock-in  
90 mouse lines, establish that ZCWPW1 is an H3K4me3 and H3K36me3 reader which preferentially but  
91 not exclusively binds at genomic loci bearing PRDM9-deposited histone modifications. ZCWPW1  
92 localizes to DMC1-labelled DSBs, where it can read H3K4me3 and H3K36me3 marks, and we confirm  
93 *in vivo* that ZCWPW1's H3K4me3 reader function contributes to meiotic recombination by greatly  
94 facilitating the DSB repair process. Thus, beyond demonstrating that a histone modification reader  
95 protein functions in an epigenetics-based recombination hotspot selection system, this study advances  
96 our understanding of the sequence of recruitment events that are required for crossover formation during  
97 meiosis.

## 98 **RESULTS**

### 99 **ZCWPW1 is an H3K4me3 reader and its binding at chromosomal axes promotes completion of** 100 **synapsis**

101 We previously developed *Zcwpw1* knockout (KO) mice in the C57BL/6 genetic background in an earlier  
102 study (Li et al., 2019a), and in light of the known capacity of ZCWPW1 to recognize epigenetic  
103 methylation modification marks, we designed a knock-in strategy to generate a candidate H3K4me3  
104 reader-dead mutant variant of ZCWPW1 (Fig. S1B). Specifically, this knock-in mutant variant of  
105 ZCWPW1 had three mutations: W247I /E292R /W294P. These mutations in murine ZCWPW1 are  
106 positionally equivalent to the previously reported W256I, E301R, and W303P mutations in the human

107 ZCWPW1 protein, all of which are in its zf-CW domain, and all of which are known to be essential for  
108 the H3K4me3 reader function of human ZCWPW1 (He et al., 2010).

109 After checking that the ZCWPW1<sup>W247I/E292R/W294P</sup> variant protein was expressed at levels similar to  
110 wild type (WT) ZCWPW1 (Fig. S1C), we prepared testis sections from 8-week-old WT, *Zcwpw1*<sup>-/-</sup>, and  
111 this new *Zcwpw1*<sup>KI/KI</sup> mice line. Hematoxylin staining revealed that spermatogenesis was disrupted in  
112 the *Zcwpw1*<sup>-/-</sup> and *Zcwpw1*<sup>KI/KI</sup> mice: the seminiferous tubules of WT mice appeared normal, while the  
113 *Zcwpw1*<sup>-/-</sup> and *Zcwpw1*<sup>KI/KI</sup> mice lacked post-meiotic cell types, contained apoptotic cells, or were nearly  
114 empty. Further, the WT epididymides were full of sperm, but there were no obvious sperm detected in  
115 either the *Zcwpw1*<sup>-/-</sup> or the *Zcwpw1*<sup>KI/KI</sup> samples, suggesting meiotic arrest (Fig. 1D).

116 These *in vivo* results, viewed alongside the previous reports about the function of ZCWPW1 in  
117 meiotic process and reports demonstrating that these specific mutations on ZCWPW1's zf-CW domain  
118 affect the protein's ability to read histone modifications including H3K4me3, together support that the  
119 ZCWPW1<sup>W247I/E292R/W294P</sup> variant is an H3K4me3-reader-dead variant of ZCWPW1. Further, these  
120 results establish that mice expressing an H3K4me3-reader-dead variant of ZCWPW1 have disrupted  
121 spermatogenesis.

122 We also analyzed chromosome spreads of spermatocytes from testes of PD60 mice via  
123 immunostaining for the synaptonemal complex (SC) markers SYCP1 and SYCP3 (Fig. 1E). The  
124 leptotene and zygotene meiotic chromosomes appeared normal for all of the genotypes. However, while  
125 synapsis occurred normally in the WT samples, extremely few instances of completed chromosomal  
126 synapsis were observed in the *Zcwpw1*<sup>-/-</sup> or *Zcwpw1*<sup>KI/KI</sup> mice, with spermatogenesis arresting in a  
127 pachytene-like stage. Thus, spermatocytes lacking the H3K4me3-reader activity of the ZCWPW1  
128 protein have severely disrupted synapsis.

129 Having established that ZCWPW1 facilitates completion of synapsis during meiosis prophase I in  
130 male mice, and observed that a reader-dead ZCWPW1 variant causes the same meiotic arrest  
131 phenotypes as *Zcwpw1* genetic knockout, we next conducted chromatin immunoprecipitation  
132 sequencing (ChIP-seq) analysis using antibodies against the ZCWPW1 protein and against H3K4me3  
133 marks. The ZCWPW1 ChIP-seq data for C57BL/6 mice revealed a total of 14,688 ZCWPW1 binding  
134 peaks, with 499 peaks localized within 2000 bp of a transcription start sites (TSS), 2,416 peaks localized

135 in exons of protein-coding genes, 6,142 peaks localized in introns, as well as 5,873 peaks localized  
136 within intergenic regions (Fig. S2A).

137 A previously study found that 94% of DMC1-labeled hotspots overlap with H3K4me3 in testis,  
138 which can be considered a global feature of DSB sites in multicellular organisms (Smagulova et al.,  
139 2011). We found that the majority of ZCWPW1 peaks overlapped with H3K4me3 peaks in WT mice  
140 testes (Fig. 1A-B), supporting previous suppositions that these specifically overlapping H3K4me3  
141 peaks may serve as ZCWPW1 recognizing histone modification marks.

142 Consistent with our ChIP-seq data, we conducted immunofluorescence analysis of chromosome  
143 spreads from spermatocytes of PD60 mice with the same two antibodies and found that H3K4me3 co-  
144 localized with ZCWPW1 in the leptotene and zygotene stages (Fig. S3A). We also conducted an  
145 additional ChIP-seq analysis of testes samples from PD14 WT, *Zcwpw1*<sup>-/-</sup>, and *Zcwpw1*<sup>KI/KI</sup> mice.  
146 Obviously, this analysis indicated that no ZCWPW1 peaks were detected in the *Zcwpw1*<sup>-/-</sup> or  
147 *Zcwpw1*<sup>KI/KI</sup> mice (Fig. 1A/C). And this result suggests that the H3K4me3-reader function of this protein  
148 is essential for its capacity to bind on chromatin to function in meiosis prophase I in male mice.

149

### 150 **ZCWPW1 binding is strongly promoted by the histone modification activity of PRDM9**

151 To identify factor(s) responsible for ZCWPW1 recruitment to chromosomal axes *in vivo*, we searched  
152 for enriched motifs within the ZCWPW1 peak regions from our ChIP-seq data (Fig. S4A). This analysis  
153 identified a *de novo* motif, which is exactly the same as a known PRDM9 binding motif in C57BL/6J  
154 background mice (Fig. S4B) (Segurel, 2013; Billings et al., 2013; Walker et al., 2015), suggesting that  
155 ZCWPW1 deposition may act in a PRDM9-dependent manner. Pursuing this, we analyzed our ChIP-  
156 seq data with an anti-ZCWPW1 antibody alongside previously published ChIP-seq data for an anti-  
157 PRDM9 antibody (Grey et al., 2017). At the genome-wide level, 13% of the ZCWPW1 peaks  
158 overlapped with PRDM9 peaks. Conversely 1,934 of the 2,601 PRDM9 peaks (74%) from the previous  
159 study overlapped with ZCWPW1 peaks (Fig. 2A-B, Fig. S4C). Our further analysis of intensity of  
160 H3k4me3 peaks showed that among the Prdm9 dispositioned regions, compared with the regions non-  
161 overlapped with *Zcwpw1*, the intensity of H3k4me3 peaks overlapped *Zcwpw1* were significantly weak  
162 (Fig. S2B). Allowing for differences in the binding performance of separate antibodies in separate ChIP-

163 seq analyses, the fact that some but certainly not all of the ZCWPW1 peaks overlap with PRDM9 peaks  
164 suggest that it is the H3K4me3 and perhaps H3K36me3 epigenetic marks deposited by PRDM9, rather  
165 than the PRDM9 protein *per se*, which can explain the observed overlap of the ZCWPW1 and PRDM9  
166 binding peaks.

167 Extending the insight about the overlap between ZCWPW1 and H3K4me3 peaks in our ChIP-seq  
168 data, and in light of the well-known overlap of PRDM9 peaks with H3K4me3 and H3K36me3 peaks  
169 (Grey et al., 2017), we found that the H3K36me3 peaks shared strong overlap with ZCWPW1 peaks  
170 (Fig. S2C-E). Consistent with the ChIP-seq data, we conducted immunofluorescence analysis of  
171 chromosome spreads from spermatocytes of PD60 mice with H3K36me3 and ZCWPW1 antibodies and  
172 found that H3k36me3 co-localized with ZCWPW1 in the leptotene and zygotene stages (Fig. S3B). We  
173 next conducted ChIP-seq analysis of testes from PD14 wild type and *Prdm9*<sup>-/-</sup> knockout mutant mice  
174 (Fig. 2D-E, Fig. S4D). Intriguingly, there were very few ZCWPW1 peaks for the *Prdm9*<sup>-/-</sup> mutant testes  
175 samples (only 759 peaks, vs. 14,668 ZCWPW1 peaks observed in the ChIP-seq analysis of the WT  
176 C57BL/6 mice), suggesting that ZCWPW1 binding is strongly promoted by the specific activity of  
177 PRDM9.

178 Analysis of the overlap of ZCWPW1, H3k4me3, and PRDM9 peaks in WT and *Prdm9*<sup>-/-</sup> testes  
179 showed that loss of PRDM9 function causes a sharp decrease in the extent of overlap between PRDM9  
180 and ZCWPW1 peaks (Fig. 2D-E, Fig. S4D). We also examined whether *Prdm9*<sup>-/-</sup> mice had H3k4me3  
181 peaks and H3K36me3 at the PRDM9 binding regions which we had detected in wild type mice: the  
182 number of such H3k4me3 peaks and H3K36me3 decreased sharply upon loss of PRDM9 function (Fig.  
183 2D-E, Fig. S4D and S2E). However, in our ChIP-seq data, we showed that the H3K4me3 peaks overlap  
184 with PRDM9 but without ZCWPW1 have no obviously difference in wild type and *Prdm9*<sup>-/-</sup> testes. We  
185 speculated that other than PRDM9 acts as an indispensable methyltransferase in meiosis; it may also  
186 act as a reader in recognizing H3k4me3 modification.

187

188 **ZCWPW1 localizes to DMC1-labelled DSB hotspots and does so in a PRDM9-dependent manner**

189 A previous study reported a single-stranded DNA sequencing (SSDS) analysis using an antibody against  
190 DMC1 in C57BL/6 mice testes (Khil et al., 2012). We compared the distribution of the DMC1 peaks in

191 that publically available data set with the ZCWPW1 peaks which we identified in our ChIP-seq analyses  
192 (Fig. S5A-C). For the WT mice, 11,124 of the 14,688 total ZCWPW1 peaks overlapped with DMC1-  
193 defined DSB hotspots. Our data for *Prdm9*<sup>-/-</sup> mice indicated an apparent lack of any overlap between  
194 DSB hotspots, ZCWPW1 peaks, and H3k4me3 signals (Fig. 3A-C). These data reinforce the idea that  
195 occupancy of ZCWPW1 at DSB hotspots is largely dependent on PRDM9-mediated histone  
196 modifications.

197 However, it bears mention that we also detected 3,609 ZCWPW1 peaks which did not obviously  
198 overlap DSB hotspots, and we found that only 759 such ZCWPW1 peaks were detected in the *Prdm9*<sup>-/-</sup>  
199 mice (Fig. 3B-C). We analyzed these 759 binding sites in detail, and it was interesting to note that 626  
200 of these peaks occurred within 5,000 bp of a TSS, a substantially larger proportion than for the average  
201 position among all hotspot ZCWPW1 peaks (Fig. S5D-G). Moreover, a GO analysis of each of these  
202 non-DSB-overlap protein-coding genes indicated enrichment for functional annotations related to  
203 embryonic development and spermatogenesis. Thus, although it is clear that the majority of the  
204 ZCWPW1 peaks result from PRDM9's activity, it is possible that ZCWPW1 may have an additional  
205 transcription regulation function that is not obviously related to the PRDM9-mediated hotspot selection  
206 system.

207

### 208 **ZCWPW1 functions in meiotic recombination by facilitating DSB repair**

209 Having established that ZCWPW1 is a reader of H3k4me3 marks which occur at chromosome sites  
210 preferentially accessed by the known meiosis-DSB-directing histone modification writer PRDM9, we  
211 speculated about the possible recombination-related function(s) of ZCWPW1. We performed  
212 immunofluorescence staining of chromosome spreads to evaluate recruitment of DMC1 and RAD51 to  
213 single-strand overhang sequences (hotspots) in wild type and *Zcwpw1*<sup>KI/KI</sup> mice (Fig. S6A-B). There  
214 were no differences in the numbers of DMC1 and RAD51 foci in the zygotene stage of the two  
215 genotypes. However, analysis of WT pachytene and *Zcwpw1*<sup>KI/KI</sup> pachytene-like spermatocytes revealed  
216 an obvious discrepancy. Decreased numbers of DMC1, RAD51 foci occurred in the pachytene wild  
217 type samples, indicating successful repair of DSBs, but *Zcwpw1*<sup>KI/KI</sup> pachytene-like samples retained a  
218 large number of DMC1, RAD51 foci. Indeed, there were actually many more DMC1 and RAD51 foci



219 in *Zcwpw1<sup>KI/KI</sup>* pachytene-like spermatocytes than in WT pachytene spermatocytes, suggesting the  
220 ongoing accumulation of DSBs in the absence of a functional ZCWPW1 protein. These results suggest  
221 that ZCWPW1 facilitates meiotic DSB repair downstream of strand invasion.

222 Seeking to further assess the functional contribution(s) of ZCWPW1 in meiotic recombination, we  
223 analyzed chromosome spreads of spermatocytes from testes of PD60 WT, *Zcwpw1<sup>-/-</sup>* and *Zcwpw1<sup>KI/KI</sup>*  
224 mice with immunostaining against the SC marker SYCP3, the recombination factors MSH4 and  
225 RNF212, and the Holliday junction dissolution marker MLH1 (Fig. 4A-B, Fig. S6C). Staining against  
226 MSH4 and RNF212 revealed that the recombination machinery can apparently assemble normally in  
227 zygotene WT cells and in zygotene *Zcwpw1<sup>-/-</sup>* and *Zcwpw1<sup>KI/KI</sup>* cells. However, these MSH4 and  
228 RNF212 signals decreased as expected in WT pachytene cells, but persisted on the pachytene-like  
229 *Zcwpw1<sup>-/-</sup>* and *Zcwpw1<sup>KI/KI</sup>* chromosomes (Fig. 4A-B). Additionally, the MLH1 staining patterns  
230 indicated that Holliday junction dissolution proceeded normally in mid- to late-pachytene WT cells but  
231 indicated that the recombination processes remained ongoing in the pachytene-like cells lacking  
232 functional ZCWPW1, failing to progress to the pachytene stage: no crossover occurred, so no MLH1  
233 foci could be observed (Fig. S6C). These results suggest that DSB repair is defective downstream of  
234 the formation of recombination intermediates in the *Zcwpw1<sup>-/-</sup>* and *Zcwpw1<sup>KI/KI</sup>* mice.

235 To determine the specific process that can mechanistically account for the observed failure to  
236 complete meiotic recombination, we analyzed chromosome spreads of spermatocytes from testes of  
237 PD60 WT, *Zcwpw1<sup>-/-</sup>*, and *Zcwpw1<sup>KI/KI</sup>* mice. Staining of leptotene and zygotene cells against the DSB  
238 site marker  $\gamma$ H2AX and the SC marker SYCP3 showed that DSBs can form normally in all of the  
239 genotypes (Fig. 5A). However, there were obvious differences between pachytene WT spermatocytes  
240 and pachytene-like *Zcwpw1<sup>-/-</sup>* and *Zcwpw1<sup>KI/KI</sup>* spermatocytes: WT pachytene spermatocyte exhibited  
241 no obvious signal for DSB sites on auto chromosomes except the sex chromosome, while both *Zcwpw1<sup>-/-</sup>*  
242 and *Zcwpw1<sup>KI/KI</sup>* pachytene-like chromosomes retained obvious  $\gamma$ H2AX signals. Moreover, XY bodies  
243 had formed in the WT pachytene spermatocytes but were not observed in the pachytene-like *Zcwpw1<sup>-/-</sup>*  
244 and *Zcwpw1<sup>KI/KI</sup>* spermatocytes. We next stained against the DSB-repair machinery component p-ATM  
245 and found—consistent with the persistent DSBs in pachytene-like spermatocyte lacking functional  
246 ZCWPW1—that DSB repair was apparently ongoing in the pachytene-like *Zcwpw1<sup>-/-</sup>* or *Zcwpw1<sup>KI/KI</sup>*

247 cells(Fig. 5B). These data indicate that ZCWPW1 is dispensable for the induction of DSBs; rather,  
248 ZCWPW1 is required for proper interhomologue interactions including synapsis and the repair of DSBs  
249 that occur in later steps of homologous recombination.

250

## 251 **DISCUSSION**

252 Our data support a working model wherein PRDM9 binds to specific DNA motifs in the genome and  
253 writes histone modifications (H3K4me3 and H3K36me3) via the methyltransferase activity of its  
254 PR/SET domain (Powers et al., 2016; Diagouraga et al., 2018). This leads to the recruitment of proteins  
255 required for the formation of DSBs in the vicinity of its binding site (e.g., SPO11, etc.) (Panizza et al.,  
256 2011; Stanzione et al., 2016; Tesse et al., 2017; Kumar et al., 2018). After these PRDM9-catalyzed  
257 epigenetic modifications are deposited, ZCWPW1 can specifically read these H3K4me3 and  
258 H3K36me3 marks in the vicinity of DSB sites, where it functions to somehow promote DSB repair.  
259 This DSB-repair-promoting function obviously greatly increases the overall completion rates of  
260 synapsis, crossover formation, and ultimately meiotic progression.

261 The identification of recombination hotspots was first made in genetically-tractable experimental  
262 organisms such as bacteriophages and fungi, but it is now apparent that hotspots are ubiquitous and  
263 active in apparently all organisms (Wahls, 1998). Higher-order chromosome architecture, which can be  
264 described using terminology of the “tethered-loop/axis complex” model, contributes to DSB hotspot  
265 localization (Blat et al., 2002). Different strategies and mechanisms for the spatial regulation of DSB  
266 formation have evolved in different species, although commonalities exist (de Massy, 2013; Baudat et  
267 al., 2013). By considering the evolution of hotspot selection systems, we have become interested in  
268 whether other meiotic factors may have evolved in vertebrates to link PRDM9 to the machinery of  
269 meiotic recombination and/or the synaptonemal complex, which permit direct interactions with the  
270 histone marks deposited by PRDM9.

271 In *S. cerevisiae*, Spp1—whose PHD finger domain is known to read H3K4me3 marks— promotes  
272 meiotic DSB formation by interacting with the axis-bound Spo11 accessory protein Mer2  
273 (Sommermeyer et al., 2013; Acquaviva et al., 2013). In mammals, our study supports that another, as-  
274 yet unknown protein(s) may function in a similar role during DSB formation. It is noteworthy that there

275 is structural similarity between the zf-CW domain and the PHD finger of Spp1 that helps recognize  
276 histone H3 tails (Adams-Cioaba and Min, 2009). Moreover, structural analysis has indicated that human  
277 ZCWPW1's zf-CW domain is a histone modification reader (He et al., 2010), and chromatin pulldown  
278 analysis has confirmed that ZCWPW1's zf-CW domain recognizes H3K4me3 marks (Hoppmann et al.,  
279 2011). In the present study, we showed that ZCWPW1 can specifically read H3K4me3 and H3K36me3  
280 marks in the vicinity of DSB sites. However, somewhat surprisingly, our subsequent experiments  
281 indicated that deficiency of ZCWPW1 does not affect the recruitment of recombination-related factors  
282 like DMC1, MSH4, and RNF212, thereby implying there may be other unknown protein(s) which  
283 function to link PRDM9 to the DSB machinery.

284 ZCWPW1 possesses a Zinc Finger CW-Type domain and a PWWP domain. The zf-CW domain has  
285 previously been shown to bind to the H3K4me3 peptides (He et al., 2010). The PWWP domain, another  
286 type of 'reader' module, has been demonstrated to recognize H3K36me3 in the peptide and nucleosome  
287 contexts (Eidahl et al., 2013; Rondelet et al., 2016; Vezzoli et al., 2010). Consistent with a recently  
288 deposited pre-print at bioRxiv which showed, *in vitro*, that ZCWPW1 can bind to histone H3 peptides  
289 with double H3K4me3 and H3K36me3 marks with high affinity at a 1:1 ratio (Mahgoub et al., 2019),  
290 we also found that ZCWPW1 is localized to H3K4me3 and H3K36me3 enrichment regions in our ChIP-  
291 seq analysis. Notably, most of ZCWPW1 peaks overlapping H3K4me3 peaks disappeared in *Prdm9*-  
292 null mice. One functional purport of our study is that it is PRDM9's histone modification activity, rather  
293 than the chromatin residence of the PRDM9 protein *per se*, which can account for the functional  
294 interactions of the apparently co-involved ZCWPW1 and PRDM9 proteins.

295 Our H3K4me3-reader-dead mutant mice results showed *in vivo* that, upon disruption of the binding  
296 capacity of the ZCWPW1's Zinc Finger CW-Type domain for H3K4me3 marks, the ZCWPW1 protein  
297 completely lost its ability to bind chromosome axes, and spermatocytes in mice expressing this knock-  
298 in H3K4me3-reader-dead variant ZCWPW1 exhibited a near-complete failure of meiosis prophase I. It  
299 remains unclear whether ZCWPW1's PWWP domain (which likely functions in reading H3K36me3  
300 mark) and/or other regions of the ZCWPW1 protein confer similarly impactful functions. Indeed, we  
301 anticipate that our future work will pursue the selective disruption of the function of particular  
302 ZCWPW1 domains in our attempts to elucidate this protein's function(s) in male meiosis I. A detailed

303 prediction analysis of potential binding sites for ZCWPW1 based on our CHIP-data indicated that there  
304 are 499 ZCWPW1 binding sites located within 2000bp of the TSS regions of protein-encoding genes,  
305 and a GO analysis suggested that many of these genes have functions relating to meiosis. We speculate  
306 that ZCWPW1 may exert a function as a transcription factor which controls the timely transcription of  
307 meiosis-related genes.

308 While we clearly show that ZCWPW1 greatly facilitates PRDM9-dependent DSB repair, we do not  
309 yet have strong evidence suggesting the precise nature of its functional role. One possibility is that  
310 ZCWPW1, upon binding to PRDM9-dependent histone modification hotspots, may serve as a DSB  
311 mark, which can perhaps subsequently recruit other factors involved in DSB repair. Recent studies have  
312 reported that PRDM9 binds on both the cut and uncut template chromosomes to promote meiotic  
313 recombination (Hinch et al., 2019; Li et al., 2019b). It is also possible that ZCWPW1 may directly  
314 interact with SC machinery through its SCP1-like domain to tether PRDM9-bound loops to the SC to  
315 promote homologous DSB repair.

316 In summary, our study identifies ZCWPW1 as an H3K4me3 and H3K36me3 reader that promotes  
317 repair of DNA double-strand breaks during meiotic recombination, excluding previous suppositions  
318 that perhaps this protein directs the location or the formation of DSBs (Mahgoub et al., 2019; Wells et  
319 al., 2019). In future studies, we plan to focus on additional proteins (*e.g.*, ZCWPW2, MORC3/4 etc.)  
320 which have similar functional domains with ZCWPW1 (Liu et al., 2016), with the aim of identifying  
321 any unknown biomolecules which act to link PRDM9 to the DSB machinery specifically or to meiotic  
322 recombination more generally.

323

## 324 MATERIALS AND METHODS

### 325 Mice

326 The *Zcwpw1* gene (NCBI Reference Sequence: NM\_001005426.2) is located on mouse chromosome 5  
327 and comprises 17 exons, with its ATG start codon in exon 2 and a TAG stop codon in exon 17. The  
328 *Zcwpw1* knockout mice were generated in our previous study (Li et al., 2019a). The *Zcwpw1* knock-in  
329 H3K4me3-reader-dead mutant mice were generated by mutating 3 sites. The W247I (TGG to ATT)  
330 point mutation was introduced into exon 8 in 5' the homology arm, and the E292R (GAG to CGG) and

331 W294P (TGG to CCG) point mutations were introduced into exon 9 in the 3' homology arm. The W247I  
332 (TGG to ATT), E292R (GAG to CGG), and W294P (TGG to CCG) mutations created in the mouse  
333 *Zcwpw1* gene are positionally equivalent to the W256I, E301R, and W303P mutations previously  
334 reported in the human *ZCWPWI* gene. To engineer the targeting vector, homology arms were generated  
335 by PCR using BAC clones RP24-387B18 and RP24-344E7 from the C57BL/6 library as templates. In  
336 the targeting vector, the Neo cassette was flanked by SDA (self-deletion anchor) sites. DTA was used  
337 for negative selection. C57BL/6 ES cells were used for gene targeting. Genotyping was performed by  
338 PCR amplification of genomic DNA extracted from mouse tails. PCR primers for the *Zcwpw1* Neo  
339 deletion were Forward: 5'-CACTGAGTTAATCCCACCTACGTC-3' and Reverse:  
340 5'CTCTCCCAAACCATCTCAAACATT-3', with targeted point mutants yielding a 318 bp fragment  
341 and wild type mice yielding a 174 bp fragment.

342 The mouse *Prdm9* gene (GenBank accession number: NM\_144809.3) is located on mouse  
343 chromosome 17. Ten exons have been identified, with the ATG start codon in exon 1 and TAA stop  
344 codon in exon 10. The *Prdm9* knockout mice in a C57BL/6 genetic background were generated by  
345 deleting the genomic DNA fragment covering exon 1 to exon 9 using the CRISPR/Cas9-mediated  
346 genome editing system (performed commercially by Cyagen Biosciences). The founders were  
347 genotyped by PCR followed by DNA sequencing analysis. Genotyping was performed by PCR  
348 amplification of genomic DNA extracted from mouse tails. PCR primers for the *Prdm9* mutant allele  
349 were Forward: 5'-GCTTAGGTAGCAGAATTGAAGGGAAAGTC-3' and Reverse: 5'-  
350 GTTTGTGTCTTTCTAACTCAAACCTTCTGCA-3', yielding a 580 bp fragment. PCR primers for the  
351 *Prdm9* wild type allele were Forward: 5'- GCTTAGGTAGCAGAATTGAAGGGAAAGTC-3' and  
352 Reverse: 5'- TCGTGGCGTAATAATAGAGTGCCTTG-3', yielding a 401 bp fragment.

353 All mice were housed under controlled environmental conditions with free access to water and food,  
354 and illumination was on between 6 am and 6 pm. All experimental protocols were approved by the  
355 Animal Ethics Committee of the School of Medicine of Shandong University.

356

357 **Tissue collection and histological analysis**

358 Testes from least three mice for each genotype were dissected immediately after euthanasia, fixed in 4%  
359 (mass/vol) paraformaldehyde (Solarbio) for up to 24 h, stored in 70% ethanol, and embedded in paraffin  
360 after dehydration, and 5  $\mu$ m sections were prepared and mounted on glass slides. After deparaffinization,  
361 slides were stained with hematoxylin for histological analysis using an epifluorescence microscope  
362 (BX52, Olympus); images were processed using Photoshop (Adobe).

363

### 364 **Chromosome spread immunofluorescence analysis**

365 Spermatocyte spreads were prepared as previously described (Peters et al., 1997). Primary antibodies  
366 used for immunofluorescence were as follows: rabbit anti-ZCWPW1 (1:1,000 dilution; homemade(Li  
367 et al., 2019a)), mouse anti-SCP3 (1:500 dilution; Abcam #ab97672), rabbit anti-SCP1 (1:2,000 dilution;  
368 Abcam # ab15090), rabbit anti-RAD51 (1:200 dilution; Thermo Fisher Scientific #PA5-27195), rabbit  
369 anti-DMC1 (1:100 dilution; Santa Cruz Biotechnology #sc-22768), mouse anti- $\gamma$ H2AX (1:300 dilution;  
370 Millipore #05-636), mouse anti-pATM (1:500 dilution; Sigma-Aldrich # 05-740), rabbit anti-MSH4  
371 (1:500 dilution; Abcam #ab58666), RNF212 (1:500 dilution; a gift from Mengcheng Luo, Wuhan  
372 University), mouse anti-MLH1 (1:50 dilution; BD Biosciences #550838), rabbit anti-H3K4me3 (1:500  
373 dilution; Abcam #ab8580), and rabbit anti-H3K36me3 (1:500 dilution; Abcam #ab9050). Primary  
374 antibodies were detected with Alexa Fluor 488-, 594-, or 647-conjugated secondary antibodies (1:500  
375 dilution, Thermo Fisher Scientific #A-11070, Abcam #ab150084, #ab150067, #ab150113, #ab150120,  
376 #ab150119, #ab150165, #ab150168, and #ab150167) for 1 h at room temperature. The slides were  
377 washed with PBS for several times and mounted using VECTASHIELD medium with DAPI (Vector  
378 Laboratories, # H-1200). Immunolabeled chromosome spreads were imaged by confocal microscopy  
379 using a Leica TCS SP5 resonant-scanning confocal microscope. Projection images were then prepared  
380 using ImageJ Software (NIH, Ver. 1.6.0-65) or Bitplane Imaris (version8.1) software.

381

### 382 **Immunoblotting**

383 To prepare protein extracts, tissues were collected from male C57BL/6 mice and lysed in TAP lysis  
384 buffer (50 mM HEPES-KOH, pH 7.5, 100 mM KCl, 2 mM EDTA, 10% glycerol, 0.1% NP-40, 10 mM  
385 NaF, 0.25 mM Na<sub>3</sub>VO<sub>4</sub>, 50 mM  $\beta$ -glycerolphosphate) plus protease inhibitors (Roche, 04693132001)

386 for 30 min on ice, followed by centrifugation at 4°C at 13,000 × g for 15 min. The supernatant were  
387 used for Western blotting. Equal amounts of protein were electrophoresed on 10% Bis-Tris Protein Gels  
388 (Invitrogen, NP0315), and the bands were transferred to polyvinylidene fluoride membranes (Millipore).  
389 The primary antibodies for immunoblotting included anti-tubulin (1:10,000 dilution; Proteintech Group,  
390 #11224-1-AP), and anti-ZCWPW1 (1:5,000 dilution; homemade). Immunoreactive bands were  
391 detected and analyzed with a Bio-Rad ChemiDoc MP Imaging System and Image Lab Software (Bio-  
392 Rad).

393

### 394 **ChIP-seq experiments**

395 The collected cells from testes were cross-linked in 100 µL of 1% formaldehyde in PBS at room  
396 temperature for 10 min. 25 µL 1.25M glycine solution was added, followed by mixing via gentle tapping  
397 and incubation at room temperature for 5 min. After that, the cell pellet was washed in PBS for three  
398 times. Dynabeads Protein A beads (Life Technologies, 10001D) of 25 µL were washed twice with 200  
399 µL ice-cold 140 mM RIPA buffer (10 mM Tris-HCl pH 7.5, 140 mM NaCl, 1 mM EDTA, 0.5 mM  
400 EGTA, 0.1% SDS, 0.1% Na-deoxycholate, 1% Triton X-100, 1mM PMSF, 1x Cocktail proteinase  
401 inhibitor, 20 mM Na-butyrate), followed by resuspension in RIPA buffer to a final volume of 200 µL in  
402 a 1.5ml tube. 5 µl H3K4me3 antibody (Abcam, ab8580) or 7µl ZCWPW1 antibody (homemade, 5ug/µl)  
403 or 5µl H3K36me3 antibody(Abcam, ab9050) was added into the beads suspension, followed by  
404 incubation on a tube rotator for at least 2.5 hrs at 4°C. The antibody-coated beads were then washed  
405 twice in 140mM RIPA buffer, followed by resuspension with 200 µL 140mM RIPA buffer.

406 The cross-linked cells were incubated in 150 µL lysis buffer (50 mM Tris-HCl pH 8.0, 10 mM  
407 EDTA pH8.0, 0.5% SDS, 1mM PMSF, 1x proteinase inhibitor cocktail, 20 mM Na-butyrate) for 20 min  
408 on ice, then sonicated using a Diagenode Bioruptor sonication device for 23 cycles (30s ON and then  
409 30s OFF). 150µl 300mM RIPA [No SDS] (10 mM Tris-HCl pH 7.5, 300 mM NaCl, 1 mM EDTA, 0.5  
410 mM EGTA, 1% Triton X-100, 0.1% Na-deoxycholate, 1mM PMSF, 1x Cocktail proteinase inhibitor,  
411 20 mM Na-butyrate) and 200µl 140mM RIPA [No SDS] were added to the samples. After centrifugation  
412 at 13,000 × g for 10 min at 4°C, 40 µL supernatant was taken out and used as sample input. The

413 remaining supernatant was transferred to a 1 ml tube containing suspended antibody-coated Protein A  
414 beads, followed by incubation on a tube rotator overnight at 4°C.

415 For the H3K4me3 and H3K36me3 antibodies, the incubated Protein A beads were washed once  
416 with RIPA buffer containing 250 mM NaCl, three times with RIPA buffer containing 500 mM NaCl,  
417 and once with TE buffer (10 mM Tris-HCl pH 8.0, 1mM EDTA). For the ZCWPW1 antibody, the  
418 incubated Protein A beads were washed twice with RIPA buffer containing 250 mM NaCl, once with  
419 RIPA buffer containing 500mM NaCl, and once with TE buffer for one time. Next, the beads were  
420 transferred to a new 0.5ml tube, followed by incubation in 100 µL ChIP elution buffer (10mM Tris-HCl  
421 pH8.0, 5mM EDTA, 300mM NaCl, 0.5% SDS) containing 5 µL proteinase K (Qiagen, 20mg/ml stock)  
422 at 55°C for 2 h, 65°C for 4 h. The eluate was transferred to a 0.5 mL tube. The enriched DNA was  
423 purified by phenol–chloroform, followed by dissolution in 50 µL TE buffer.

424 An NEBNext Ultra II DNA Library Prep Kit for Illumina (NEB, E7645S) was used for library  
425 construction according to product instructions. DNA was first end repaired and A-tailed by adding 7 µL  
426 NEBNext Ultra II End Prep Reaction Buffer and 3 µL NEBNext Ultra II End Prep Enzyme Mix.  
427 Samples were incubated at 20°C for 30min, 65°C for 30min, and finally cooled to 4°C in a thermal  
428 cycler. Adaptor ligation was performed by adding 30 µL NEBNext Ultra II Ligation Master Mix, 1 µL  
429 NEBNext Ligation Enhancer, 0.8 µL 200mM ATP, and 2.5 µL 15 µM Illumina Multiplexing Adaptors.  
430 Samples were thoroughly mixed and incubated at 20°C for 40 min. Following adaptor ligation, 1.2  
431 volume SPRIselect beads (Beckman Coulter, B23318) were used to purify DNA. PCR amplification  
432 was performed with NEBNext Ultra II Q5 Master Mix. The PCR cycle number was evaluated using a  
433 FlashGel™ System (Lonza, 57063). The volume of the PCR product was adjusted to 100 µL by adding  
434 50 µl TE buffer. The 300-700 bp DNA fragments were selected with 0.5 volume plus 0.5 volume  
435 SPRIselect beads, then eluted in 20 µL water. The libraries were sequenced on a Hiseq X-ten instrument  
436 set for paired-end 150 bp sequencing (Illumina).

437

#### 438 **ChIP-seq Bioinformatics Analysis**

439 The ChIP-seq raw reads were cropped to 100 bp, and the low quality reads were removed using  
440 Trimmomatic v0.32 (Bolger et al., 2014). Paired reads were mapped to the mouse genome (version



441 mm10) by Bowtie2 v2.3.4.2 with parameters “-X 2000 -no-discordant -no-contain” (Langmead and  
442 Salzberg, 2012). Reads with low mapping quality (MAPQ < 10) and PCR duplicated reads were  
443 removed by Samtools and Picard (DePristo et al., 2011; Li et al., 2009). The H3K4me3 peaks were  
444 called by MACS2 v2.1.0 (Zhang et al., 2008) with parameters “-keep-dup all -SPMR -p 0.01 -nomodel,  
445 ZCWPW1 peaks with parameters --keep-dup all -SPMR -p 0.001 -nomodel, H3K36me3 peaks with  
446 parameters -B --SPMR --broad -nomodel. DMC1 and PRDM9 raw data and peaks were directly  
447 obtained from the paper above, and transformed to mm10 by the LiftOver application from UCSC.  
448 ZCWPW1 peaks were further selected based on intensity greater than a 3-fold enrichment over the input  
449 lambda. The normalized signals of H3K4me3, H3K36me3, ZCWPW1, PRDM9, and DMC1 were  
450 generated using macs2 bdgcmp, following the output produced by macs2 Callpeak with SPRM (reads  
451 per million for each covered position). The Fold Change over lamda worked as signal enrichment, and  
452 transformed into Bigwig by bedGraphToBigWig. ChIP-seq signal tracks were visualized by Integrative  
453 Genomics Viewer (IGV) (Robinson et al., 2011). Deeptools2 (Ramirez et al., 2016) and R (3.4.4) were  
454 used to generate the profile plot and heatmap. The script findMotifsGenome.pl function in HOMER  
455 software (Heinz et al., 2010) was used to examine enrichment for transcription factor binding motifs.  
456 GO analysis conducted using Metascape (Zhou et al., 2019). The gene-region association and ontology  
457 analysis in Mouse Phenotype Single KO were fulfilled by GREATER software (McLean et al., 2010).  
458 All analyses for inferential statistical significance (p value) were obtained through Mann-Whitney U  
459 Tests.

460

#### 461 **Author contributions**

462 Tao Huang performed ChIP-seq, analyzed and interpreted the data, wrote and edited the manuscript;  
463 Shenli Yuan performed ChIP-seq and data analysis; Mengjing Li, Xiaochen Yu performed Western  
464 blot and IF experiments, helped write and edit the manuscript; Yingying Yin bred the mice and  
465 performed the Western blot; Jianhong Zhang and Lei Gao provided guidance of ChIP-seq; Chao Liu  
466 and Wei Li discussed the mouse model construction and the ChIP-seq strategy; Jiang Liu, Zi-Jiang  
467 Chen and Hongbin Liu supervised the study, wrote and edited the manuscript.

468

469 **Acknowledgments**

470 We are grateful for the interesting discussion with K. Liu from the University of Hong Kong, China,  
471 in the very initial phase of the study. Funding: This work was supported by the National Key Research  
472 and Development Programs of China [2018YFC1003400] and the Major Program of National Natural  
473 Science Foundation of China [31890780].

474

475 **Declaration of interests**

476 The authors declare no competing interests.

477

478

479 **References**

- 480 1. Handel MA and Schimenti JC. Genetics of mammalian meiosis: regulation,  
481 dynamics and impact on fertility. *Nature reviews Genetics*. 2010; 11: 124-36.  
482 doi:10.1038/nrg2723.
- 483 2. Bolcun-Filas E and Schimenti JC. Genetics of meiosis and recombination in mice.  
484 *International review of cell and molecular biology*. 2012; 298: 179-227.  
485 doi:10.1016/B978-0-12-394309-5.00005-5.
- 486 3. Hunter N. Meiotic Recombination: The Essence of Heredity. *Cold Spring Harbor*  
487 *perspectives in biology*. 2015; 7. doi:10.1101/cshperspect.a016618.
- 488 4. Gray S and Cohen PE. Control of Meiotic Crossovers: From Double-Strand Break  
489 Formation to Designation. *Annual review of genetics*. 2016; 50: 175-210.  
490 doi:10.1146/annurev-genet-120215-035111.
- 491 5. Zickler D and Kleckner N. Recombination, Pairing, and Synapsis of Homologs  
492 during Meiosis. *Cold Spring Harbor perspectives in biology*. 2015; 7.  
493 doi:10.1101/cshperspect.a016626.
- 494 6. de Massy B. Initiation of meiotic recombination: how and where? Conservation  
495 and specificities among eukaryotes. *Annual review of genetics*. 2013; 47: 563-99.  
496 doi:10.1146/annurev-genet-110711-155423.
- 497 7. Baudat F, Imai Y and de Massy B. Meiotic recombination in mammals:  
498 localization and regulation. *Nature reviews Genetics*. 2013; 14: 794-806.  
499 doi:10.1038/nrg3573.
- 500 8. Sun F, Fujiwara Y, Reinholdt LG, et al. Nuclear localization of PRDM9 and its role  
501 in meiotic chromatin modifications and homologous synapsis. *Chromosoma*. 2015; 124:  
502 397-415. doi:10.1007/s00412-015-0511-3.

- 503 9. Parvanov ED, Tian H, Billings T, et al. PRDM9 interactions with other proteins  
504 provide a link between recombination hotspots and the chromosomal axis in meiosis.  
505 *Molecular biology of the cell*. 2017; 28: 488-99. doi:10.1091/mbc.E16-09-0686.
- 506 10. Grey C, Baudat F and de Massy B. PRDM9, a driver of the genetic map. *PLoS*  
507 *genetics*. 2018; 14: e1007479. doi:10.1371/journal.pgen.1007479.
- 508 11. Paigen K and Petkov PM. PRDM9 and Its Role in Genetic Recombination. *Trends*  
509 *in genetics : TIG*. 2018; 34: 291-300. doi:10.1016/j.tig.2017.12.017.
- 510 12. Sommermeyer V, Beneut C, Chaplais E, Serrentino ME and Borde V. Spp1, a  
511 member of the Set1 Complex, promotes meiotic DSB formation in promoters by  
512 tethering histone H3K4 methylation sites to chromosome axes. *Molecular cell*. 2013; 49:  
513 43-54. doi:10.1016/j.molcel.2012.11.008.
- 514 13. Acquaviva L, Szekvolgyi L, Dichtl B, et al. The COMPASS subunit Spp1 links  
515 histone methylation to initiation of meiotic recombination. *Science*. 2013; 339: 215-8.  
516 doi:10.1126/science.1225739.
- 517 14. Myers S, Bowden R, Tumian A, et al. Drive against hotspot motifs in primates  
518 implicates the PRDM9 gene in meiotic recombination. *Science*. 2010; 327: 876-9.  
519 doi:10.1126/science.1182363.
- 520 15. Parvanov ED, Petkov PM and Paigen K. Prdm9 controls activation of mammalian  
521 recombination hotspots. *Science*. 2010; 327: 835. doi:10.1126/science.1181495.
- 522 16. Baudat F, Buard J, Grey C, et al. PRDM9 is a major determinant of meiotic  
523 recombination hotspots in humans and mice. *Science*. 2010; 327: 836-40.  
524 doi:10.1126/science.1183439.
- 525 17. Brick K, Smagulova F, Khil P, Camerini-Otero RD and Petukhova GV. Genetic  
526 recombination is directed away from functional genomic elements in mice. *Nature*.  
527 2012; 485: 642-5. doi:10.1038/nature11089.
- 528 18. Powers NR, Parvanov ED, Baker CL, Walker M, Petkov PM and Paigen K. The  
529 Meiotic Recombination Activator PRDM9 Trimethylates Both H3K36 and H3K4 at  
530 Recombination Hotspots In Vivo. *PLoS genetics*. 2016; 12: e1006146.  
531 doi:10.1371/journal.pgen.1006146.
- 532 19. Diagouraga B, Clement JAJ, Duret L, Kadlec J, de Massy B and Baudat F. PRDM9  
533 Methyltransferase Activity Is Essential for Meiotic DNA Double-Strand Break Formation  
534 at Its Binding Sites. *Molecular cell*. 2018; 69: 853-65 e6.  
535 doi:10.1016/j.molcel.2018.01.033.
- 536 20. Grey C, Clement JA, Buard J, et al. In vivo binding of PRDM9 reveals interactions  
537 with noncanonical genomic sites. *Genome research*. 2017; 27: 580-90.  
538 doi:10.1101/gr.217240.116.
- 539 21. Bergerat A, de Massy B, Gadelle D, Varoutas PC, Nicolas A and Forterre P. An  
540 atypical topoisomerase II from Archaea with implications for meiotic recombination.  
541 *Nature*. 1997; 386: 414-7. doi:10.1038/386414a0.
- 542 22. Keeney S, Giroux CN and Kleckner N. Meiosis-specific DNA double-strand  
543 breaks are catalyzed by Spo11, a member of a widely conserved protein family. *Cell*.  
544 1997; 88: 375-84. doi:10.1016/s0092-8674(00)81876-0.

- 545 23. Robert T, Nore A, Brun C, et al. The TopoVIB-Like protein family is required for  
546 meiotic DNA double-strand break formation. *Science*. 2016; 351: 943-9.  
547 doi:10.1126/science.aad5309.
- 548 24. Vrielynck N, Chambon A, Vezon D, et al. A DNA topoisomerase VI-like complex  
549 initiates meiotic recombination. *Science*. 2016; 351: 939-43.  
550 doi:10.1126/science.aad5196.
- 551 25. Panizza S, Mendoza MA, Berlinger M, et al. Spo11-accessory proteins link  
552 double-strand break sites to the chromosome axis in early meiotic recombination. *Cell*.  
553 2011; 146: 372-83. doi:10.1016/j.cell.2011.07.003.
- 554 26. Pittman DL, Cobb J, Schimenti KJ, et al. Meiotic prophase arrest with failure of  
555 chromosome synapsis in mice deficient for Dmc1, a germline-specific RecA homolog.  
556 *Molecular cell*. 1998; 1: 697-705. doi:10.1016/s1097-2765(00)80069-6.
- 557 27. Tarsounas M, Morita T, Pearlman RE and Moens PB. RAD51 and DMC1 form  
558 mixed complexes associated with mouse meiotic chromosome cores and synaptonemal  
559 complexes. *The Journal of cell biology*. 1999; 147: 207-20. doi:10.1083/jcb.147.2.207.
- 560 28. Dai J, Voloshin O, Potapova S and Camerini-Otero RD. Meiotic Knockdown and  
561 Complementation Reveals Essential Role of RAD51 in Mouse Spermatogenesis. *Cell*  
562 *reports*. 2017; 18: 1383-94. doi:10.1016/j.celrep.2017.01.024.
- 563 29. Inagaki A, Schoenmakers S and Baarends WM. DNA double strand break repair,  
564 chromosome synapsis and transcriptional silencing in meiosis. *Epigenetics*. 2010; 5:  
565 255-66. doi:10.4161/epi.5.4.11518.
- 566 30. Keeney S, Lange J and Mohibullah N. Self-organization of meiotic  
567 recombination initiation: general principles and molecular pathways. *Annual review of*  
568 *genetics*. 2014; 48: 187-214. doi:10.1146/annurev-genet-120213-092304.
- 569 31. Lange J, Pan J, Cole F, Thelen MP, Jasin M and Keeney S. ATM controls meiotic  
570 double-strand-break formation. *Nature*. 2011; 479: 237-40. doi:10.1038/nature10508.
- 571 32. Garcia V, Gray S, Allison RM, Cooper TJ and Neale MJ. Tel1(ATM)-mediated  
572 interference suppresses clustered meiotic double-strand-break formation. *Nature*.  
573 2015; 520: 114-8. doi:10.1038/nature13993.
- 574 33. Baudat F and de Massy B. Regulating double-stranded DNA break repair  
575 towards crossover or non-crossover during mammalian meiosis. *Chromosome*  
576 *research : an international journal on the molecular, supramolecular and evolutionary*  
577 *aspects of chromosome biology*. 2007; 15: 565-77. doi:10.1007/s10577-007-1140-3.
- 578 34. Kneitz B, Cohen PE, Avdievich E, et al. MutS homolog 4 localization to meiotic  
579 chromosomes is required for chromosome pairing during meiosis in male and female  
580 mice. *Genes & development*. 2000; 14: 1085-97.
- 581 35. Edelmann W, Cohen PE, Kneitz B, et al. Mammalian MutS homologue 5 is  
582 required for chromosome pairing in meiosis. *Nature genetics*. 1999; 21: 123-7.  
583 doi:10.1038/5075.
- 584 36. Yang F, Gell K, van der Heijden GW, et al. Meiotic failure in male mice lacking an  
585 X-linked factor. *Genes & development*. 2008; 22: 682-91. doi:10.1101/gad.1613608.

- 586 37. Lynn A, Soucek R and Borner GV. ZMM proteins during meiosis: crossover artists  
587 at work. *Chromosome research : an international journal on the molecular,*  
588 *supramolecular and evolutionary aspects of chromosome biology.* 2007; 15: 591-605.  
589 doi:10.1007/s10577-007-1150-1.
- 590 38. Reynolds A, Qiao H, Yang Y, et al. RNF212 is a dosage-sensitive regulator of  
591 crossing-over during mammalian meiosis. *Nature genetics.* 2013; 45: 269-78.  
592 doi:10.1038/ng.2541.
- 593 39. Li M, Huang T, Li MJ, et al. The histone modification reader ZCWPW1 is required  
594 for meiosis prophase I in male but not in female mice. *Science advances.* 2019a; 5:  
595 eaax1101. doi:10.1126/sciadv.aax1101.
- 596 40. Perry J and Zhao Y. The CW domain, a structural module shared amongst  
597 vertebrates, vertebrate-infecting parasites and higher plants. *Trends in biochemical*  
598 *sciences.* 2003; 28: 576-80. doi:10.1016/j.tibs.2003.09.007.
- 599 41. Liu Y, Tempel W, Zhang Q, et al. Family-wide Characterization of Histone  
600 Binding Abilities of Human CW Domain-containing Proteins. *The Journal of biological*  
601 *chemistry.* 2016; 291: 9000-13. doi:10.1074/jbc.M116.718973.
- 602 42. He F, Umehara T, Saito K, et al. Structural insight into the zinc finger CW domain  
603 as a histone modification reader. *Structure.* 2010; 18: 1127-39.  
604 doi:10.1016/j.str.2010.06.012.
- 605 43. Hoppmann V, Thorstensen T, Kristiansen PE, et al. The CW domain, a new  
606 histone recognition module in chromatin proteins. *The EMBO journal.* 2011; 30: 1939-  
607 52. doi:10.1038/emboj.2011.108.
- 608 44. Smagulova F, Gregoret IV, Brick K, Khil P, Camerini-Otero RD and Petukhova  
609 GV. Genome-wide analysis reveals novel molecular features of mouse recombination  
610 hotspots. *Nature.* 2011; 472: 375-8. doi:10.1038/nature09869.
- 611 45. Segurel L. The complex binding of PRDM9. *Genome biology.* 2013; 14: 112.  
612 doi:10.1186/gb-2013-14-1-112  
613 10.1186/gb-2013-14-4-112.
- 614 46. Billings T, Parvanov ED, Baker CL, Walker M, Paigen K and Petkov PM. DNA  
615 binding specificities of the long zinc-finger recombination protein PRDM9. *Genome*  
616 *biology.* 2013; 14: R35. doi:10.1186/gb-2013-14-4-r35.
- 617 47. Walker M, Billings T, Baker CL, et al. Affinity-seq detects genome-wide PRDM9  
618 binding sites and reveals the impact of prior chromatin modifications on mammalian  
619 recombination hotspot usage. *Epigenetics & chromatin.* 2015; 8: 31.  
620 doi:10.1186/s13072-015-0024-6.
- 621 48. Khil PP, Smagulova F, Brick KM, Camerini-Otero RD and Petukhova GV. Sensitive  
622 mapping of recombination hotspots using sequencing-based detection of ssDNA.  
623 *Genome research.* 2012; 22: 957-65. doi:10.1101/gr.130583.111.
- 624 49. Stanzione M, Baumann M, Papanikos F, et al. Meiotic DNA break formation  
625 requires the unsynapsed chromosome axis-binding protein IHO1 (CCDC36) in mice.  
626 *Nature cell biology.* 2016; 18: 1208-20. doi:10.1038/ncb3417.

- 627 50. Tesse S, Bourbon HM, Debuchy R, et al. Asy2/Mer2: an evolutionarily conserved  
628 mediator of meiotic recombination, pairing, and global chromosome compaction.  
629 *Genes & development*. 2017; 31: 1880-93. doi:10.1101/gad.304543.117.
- 630 51. Kumar R, Oliver C, Brun C, et al. Mouse REC114 is essential for meiotic DNA  
631 double-strand break formation and forms a complex with MEI4. *Life science alliance*.  
632 2018; 1: e201800259. doi:10.26508/lsa.201800259.
- 633 52. Wahls WP. Meiotic recombination hotspots: shaping the genome and insights  
634 into hypervariable minisatellite DNA change. *Current topics in developmental biology*.  
635 1998; 37: 37-75. doi:10.1016/s0070-2153(08)60171-4.
- 636 53. Blat Y, Protacio RU, Hunter N and Kleckner N. Physical and functional  
637 interactions among basic chromosome organizational features govern early steps of  
638 meiotic chiasma formation. *Cell*. 2002; 111: 791-802. doi:10.1016/s0092-  
639 8674(02)01167-4.
- 640 54. Adams-Cioaba MA and Min J. Structure and function of histone methylation  
641 binding proteins. *Biochemistry and cell biology = Biochimie et biologie cellulaire*. 2009;  
642 87: 93-105. doi:10.1139/O08-129.
- 643 55. Eidahl JO, Crowe BL, North JA, et al. Structural basis for high-affinity binding of  
644 LEDGF PWWP to mononucleosomes. *Nucleic acids research*. 2013; 41: 3924-36.  
645 doi:10.1093/nar/gkt074.
- 646 56. Rondelet G, Dal Maso T, Willems L and Wouters J. Structural basis for  
647 recognition of histone H3K36me3 nucleosome by human de novo DNA  
648 methyltransferases 3A and 3B. *Journal of structural biology*. 2016; 194: 357-67.  
649 doi:10.1016/j.jsb.2016.03.013.
- 650 57. Vezzoli A, Bonadies N, Allen MD, et al. Molecular basis of histone H3K36me3  
651 recognition by the PWWP domain of Brpf1. *Nature structural & molecular biology*.  
652 2010; 17: 617-9. doi:10.1038/nsmb.1797.
- 653 58. Mahgoub M, Paiano J, Bruno M, et al. Dual Histone Methyl Reader ZCWPW1  
654 Facilitates Repair of Meiotic Double Strand Breaks. *BioRxiv*. preprint first posted online  
655 Oct. 29, 2019. doi:10.1101/821603.
- 656 59. Hinch AG, Zhang G, Becker PW, et al. Factors influencing meiotic recombination  
657 revealed by whole-genome sequencing of single sperm. *Science*. 2019; 363.  
658 doi:10.1126/science.aau8861.
- 659 60. Li R, Bitoun E, Altemose N, Davies RW, Davies B and Myers SR. A high-resolution  
660 map of non-crossover events reveals impacts of genetic diversity on mammalian  
661 meiotic recombination. *Nature communications*. 2019b; 10: 3900. doi:10.1038/s41467-  
662 019-11675-y.
- 663 61. Wells D, Bitoun E, Moralli D, et al. ZCWPW1 is recruited to recombination  
664 hotspots by PRDM9, and is essential for meiotic double strand break repair. *BioRxiv*.  
665 preprint first posted online Oct. 30, 2019. doi:10.1101/821678.
- 666 62. Peters AH, Plug AW, van Vugt MJ and de Boer P. A drying-down technique for  
667 the spreading of mammalian meiocytes from the male and female germline.  
668 *Chromosome research : an international journal on the molecular, supramolecular and*

- 669 *evolutionary aspects of chromosome biology*. 1997; 5: 66-8.  
670 doi:10.1023/a:1018445520117.
- 671 63. Bolger AM, Lohse M and Usadel B. Trimmomatic: a flexible trimmer for Illumina  
672 sequence data. *Bioinformatics*. 2014; 30: 2114-20. doi:10.1093/bioinformatics/btu170.
- 673 64. Langmead B and Salzberg SL. Fast gapped-read alignment with Bowtie 2.  
674 *Nature methods*. 2012; 9: 357-9. doi:10.1038/nmeth.1923.
- 675 65. DePristo MA, Banks E, Poplin R, et al. A framework for variation discovery and  
676 genotyping using next-generation DNA sequencing data. *Nature genetics*. 2011; 43:  
677 491-8. doi:10.1038/ng.806.
- 678 66. Li H, Handsaker B, Wysoker A, et al. The Sequence Alignment/Map format and  
679 SAMtools. *Bioinformatics*. 2009; 25: 2078-9. doi:10.1093/bioinformatics/btp352.
- 680 67. Zhang Y, Liu T, Meyer CA, et al. Model-based analysis of ChIP-Seq (MACS).  
681 *Genome biology*. 2008; 9: R137. doi:10.1186/gb-2008-9-9-r137.
- 682 68. Robinson JT, Thorvaldsdottir H, Winckler W, et al. Integrative genomics viewer.  
683 *Nature biotechnology*. 2011; 29: 24-6. doi:10.1038/nbt.1754.
- 684 69. Ramirez F, Ryan DP, Gruning B, et al. deepTools2: a next generation web server  
685 for deep-sequencing data analysis. *Nucleic acids research*. 2016; 44: W160-5.  
686 doi:10.1093/nar/gkw257.
- 687 70. Heinz S, Benner C, Spann N, et al. Simple combinations of lineage-determining  
688 transcription factors prime cis-regulatory elements required for macrophage and B cell  
689 identities. *Molecular cell*. 2010; 38: 576-89. doi:10.1016/j.molcel.2010.05.004.
- 690 71. Zhou Y, Zhou B, Pache L, et al. Metascape provides a biologist-oriented  
691 resource for the analysis of systems-level datasets. *Nature communications*. 2019; 10:  
692 1523. doi:10.1038/s41467-019-09234-6.
- 693 72. McLean CY, Bristor D, Hiller M, et al. GREAT improves functional interpretation of  
694 cis-regulatory regions. *Nature biotechnology*. 2010; 28: 495-501. doi:10.1038/nbt.1630.
- 695  
696  
697  
698  
699  
700  
701  
702  
703  
704  
705  
706  
707  
708  
709  
710  
711  
712  
713

714 **Figure legends**

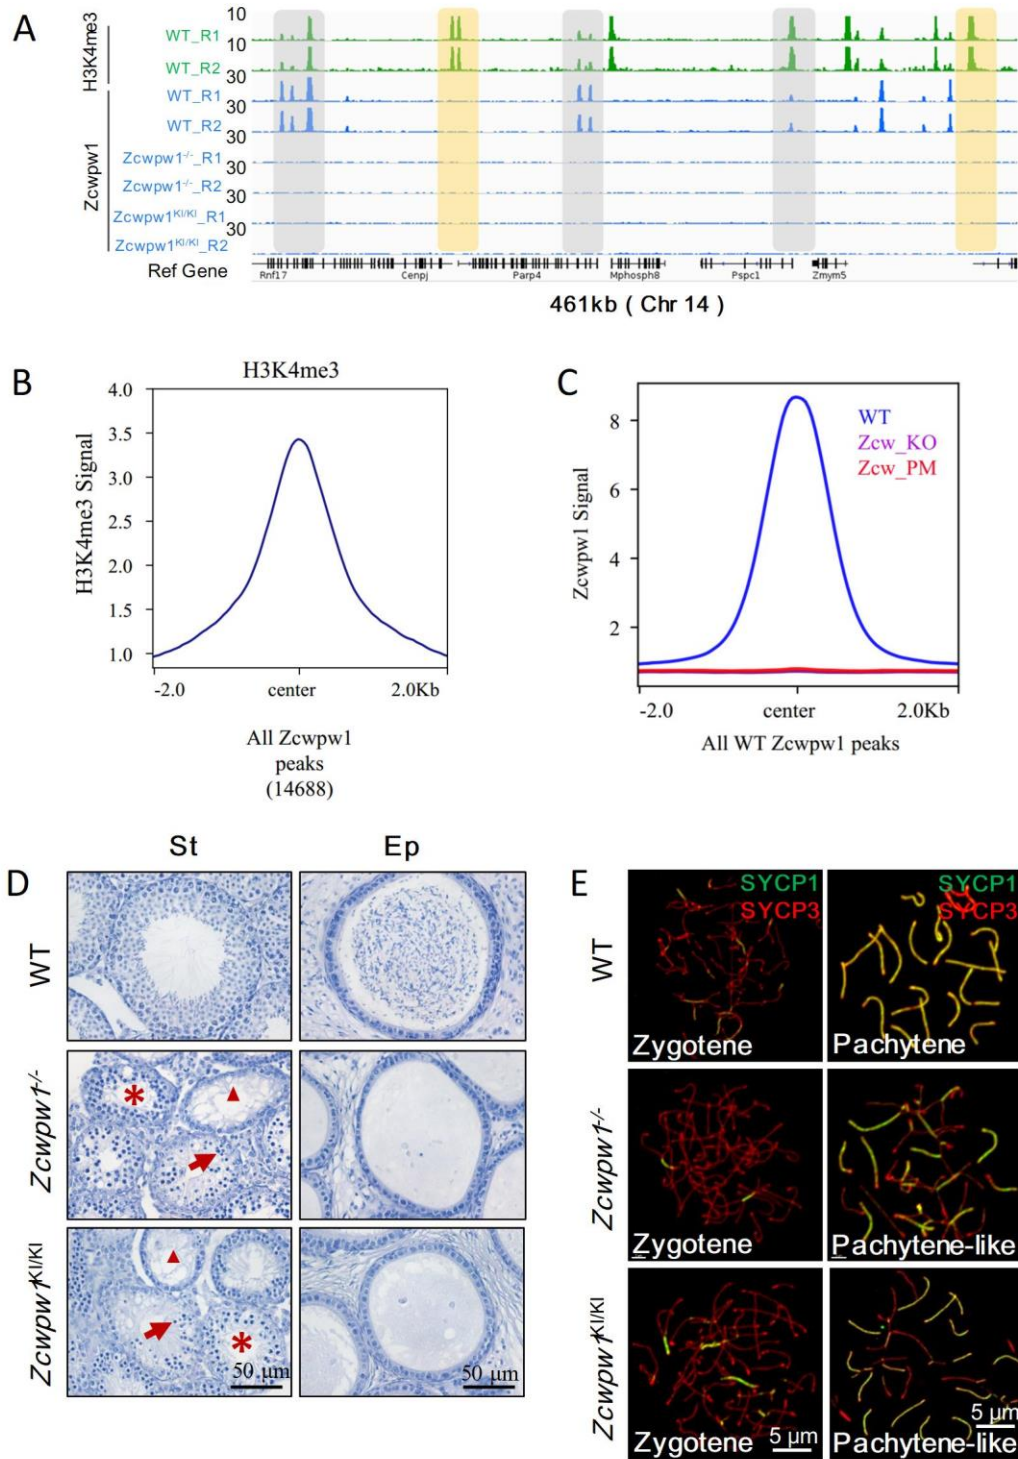

715

716 **Fig.1. ZCWPW1 is an H3K4me3 reader and its binding at chromosomal axes promotes**

717 **completion of synapsis**



718 **(A)**. ChIP-seq genome snapshot of the distribution of H3K4me3 and ZCWPW1 binding peaks in  
719 C57BL/6 wild type, *Zcwpw1*<sup>-/-</sup>, and *Zcwpw1*<sup>KI/KI</sup> mice along a 461-kb-long region of Chromosome 14.  
720 H3K4me3 and ZCWPW1 signals were normalized as described in the Methods. Overlapping reads are  
721 indicated by grey shaded areas, while non-overlapping reads of interest are indicated by orange shaded  
722 areas. **(B)**. Average plot of the H3K4me3 signal in ZCWPW1 ChIP-sequencing peaks; the plot shows  
723 the average values over 4-kb intervals for all 14,688 of the detected ZCWPW1 binding regions. **(C)**.  
724 Average plot of ZCWPW1 CHIP-sequencing in C57BL/6 wild type and *Zcwpw1*<sup>-/-</sup> and *Zcwpw1*<sup>KI/KI</sup> mice.  
725 **(D)**. Hematoxylin staining of adult C57BL/6 wild type, *Zcwpw1*<sup>-/-</sup>, and *Zcwpw1*<sup>KI/KI</sup> testis (right panel)  
726 and epididymides (left panel). Adult *Zcwpw1*<sup>-/-</sup> and *Zcwpw1*<sup>KI/KI</sup> testis sections showed near complete  
727 arrest of spermatogenesis. Arrows, apoptotic spermatocytes; arrowhead, empty seminiferous tubules;  
728 asterisk, seminiferous tubules lack of post-meiotic spermatocytes. The spermatogenic arrest led to  
729 empty epididymides in adult *Zcwpw1*<sup>-/-</sup> and *Zcwpw1*<sup>KI/KI</sup> mice. (St) Seminiferous tubules, (Ep)  
730 Epididymides. **(E)**. Chromosome spreads of spermatocytes from the testis of PD60 WT (upper panel),  
731 *Zcwpw1*<sup>-/-</sup> (middle panel), and *Zcwpw1*<sup>KI/KI</sup> (lower panel) males were immunostained for the SC marker  
732 proteins SYCP1 (green) and SYCP3 (red). The arrow indicates a pachytene spermatocyte in WT mice,  
733 with complete synapsed chromosomes, arrowheads indicate the pachytene-like spermatocytes in adult  
734 *Zcwpw1*<sup>-/-</sup> and *Zcwpw1*<sup>KI/KI</sup> mice with incompletely synapsed chromosomes.

735

736

737

738

739

740

741

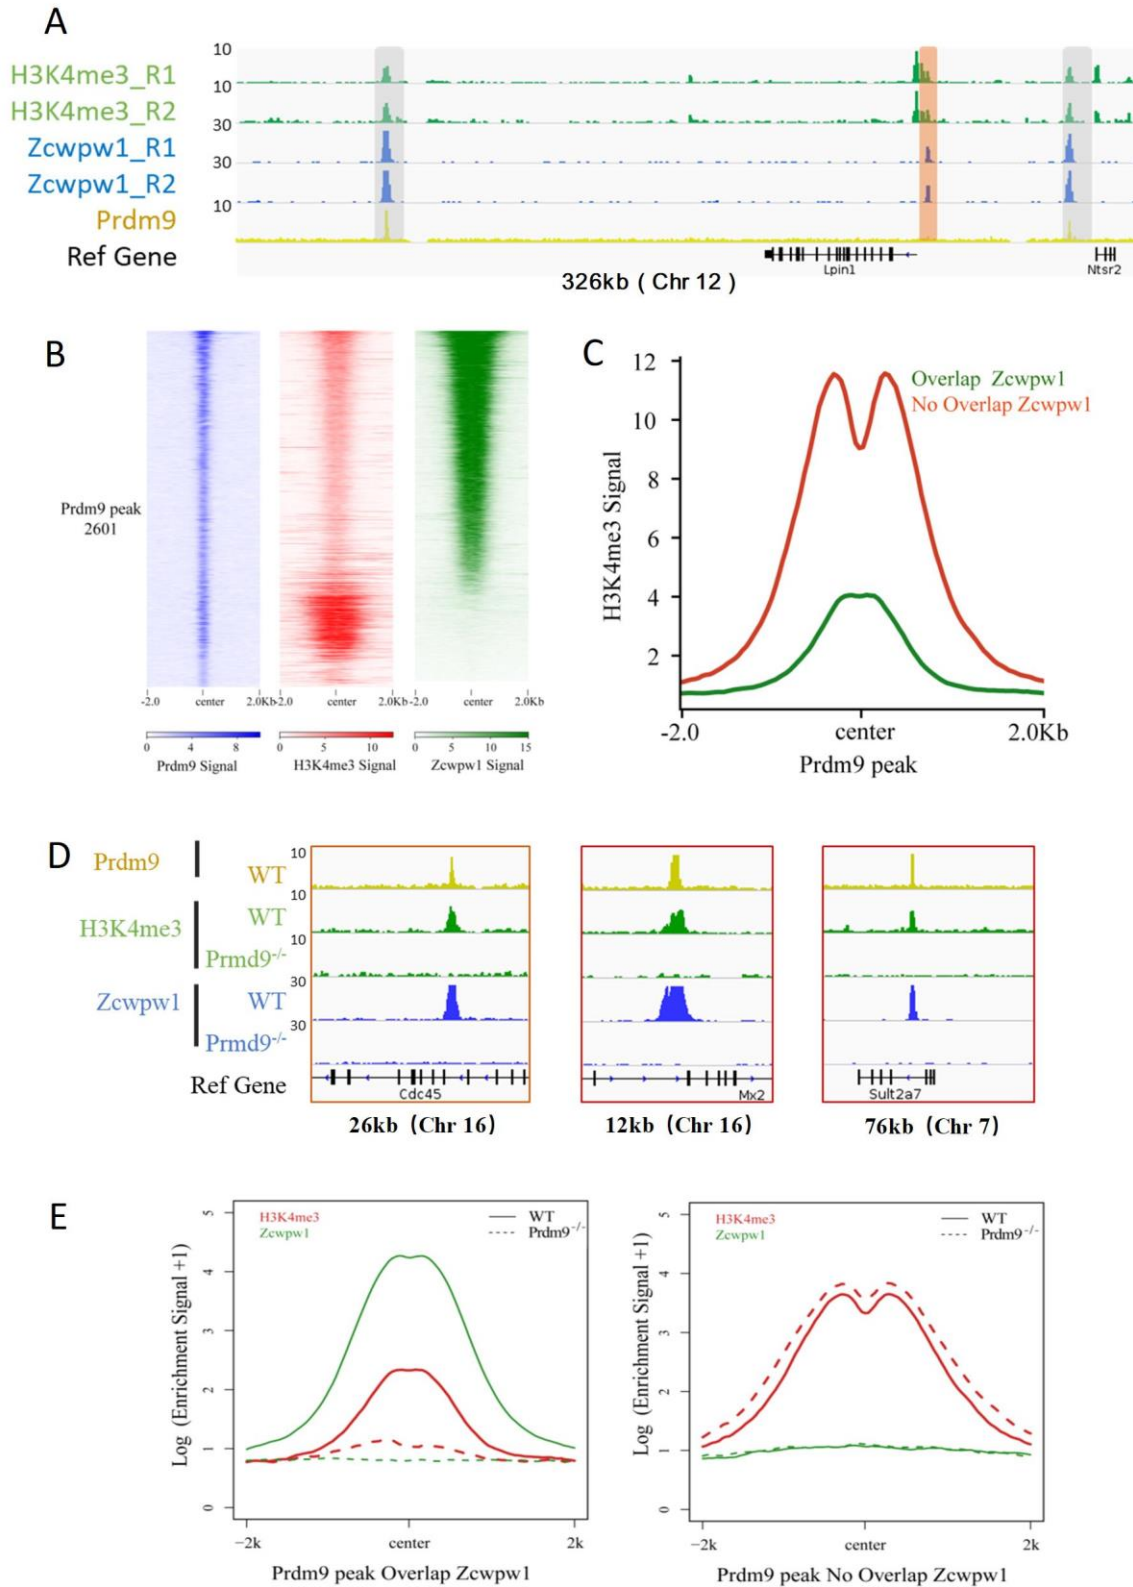

742

743

744 **Fig. 2. ZCWPW1 binding is strongly promoted by the histone modification activity of PRDM9**

745 (A). ChIP-seq genome snapshot of the distribution of bindings peaks for H3K4me3, ZCWPW1, and  
746 PRDM9 in C57BL/6 mice along a 326-kb-long region of Chromosome 12. Overlapping binding peaks  
747 in samples from all three analyses are indicated by grey shaded areas, while non-overlapping reads of  
748 interest are indicated by orange shaded areas. (B). Heatmap showing the correlation among H3K4me3,  
749 ZCWPW1, and PRDM9 binding peaks; each row represents the marker signal among the PRDM9 peaks  
750 (2601). (C). A profile plot (lower panel) showing the H3K4me3 signal between PRDM9 ChIP-  
751 sequencing peaks overlapping with ZCWPW1, or peaks lacking overlap with ZCWPW1. (D). Genome  
752 snapshot to show changes in H3K4me3 and ZCWPW1 binding distributions following *Prdm9* knockout.  
753 (E). A profile plot showing changes in H3K4me3 and ZCWPW1 binding distributions following *Prdm9*  
754 knockout.

755

756

757

758

759

760

761

762

763

764

765

766

767

768

769

770

771

772

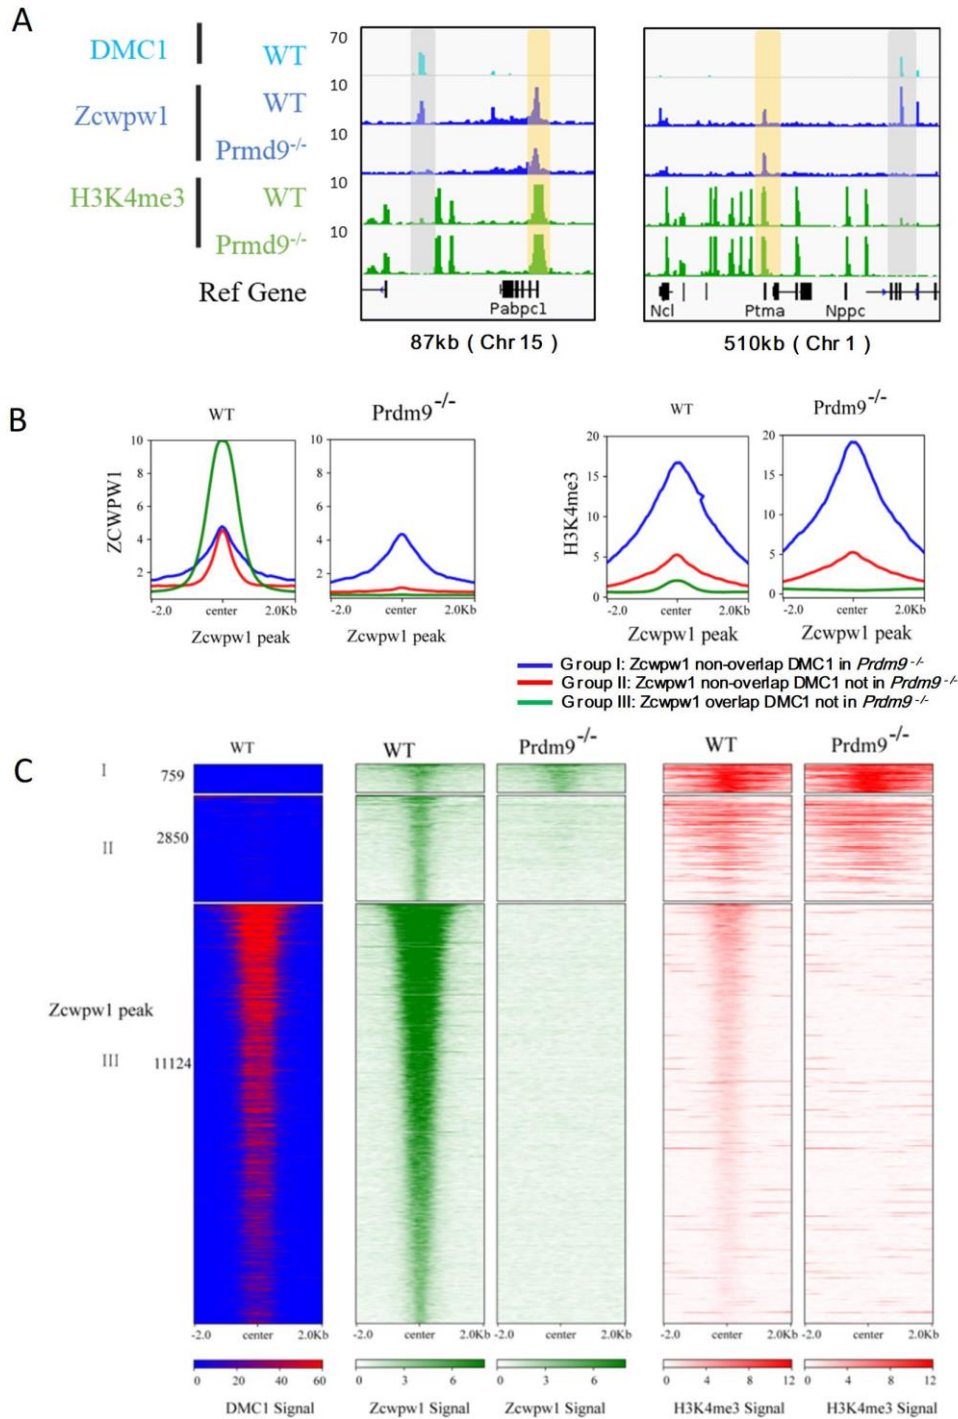

773

774

775 **Fig. 3. ZCWPW1 localizes to DMC1-labelled DSB hotspots and does so in a PRDM9-dependent**  
 776 **manner**

777 (A). ChIP-seq genome snapshot of the distribution of binding peaks for ZCWPW1, H3K4me3, and  
 778 DMC1 in C57BL/6 mice, and changes in the ZCWPW1 binding site distributions in *Prdm9* knockout  
 779 mice. ZCWPW1 and DMC1 overlapping reads are indicated by grey shaded areas, while non-

780 overlapping reads of interest are indicated by orange shaded areas. **(B)**. A typical profile showing the  
781 overlap of ZCWPW1 and H3K4me3 binding peak overlap with DMC1 or non-overlap with DMC1  
782 changes in *Prdm9* knockout mice. **(C)**. Heatmap showing ZCWPW1 and H3K4me3 overlap with  
783 DMC1 binding peaks or non-overlap with DMC1 peaks change in *Prdm9* knockout mice. Group I (759)  
784 represents ZCWPW1 peaks non-overlapping DMC1 still existing in *Prdm9* knockout mice; group II  
785 (2850) represents ZCWPW1 peaks non-overlapping DMC1 lost in *Prdm9* knockout mice; group III  
786 (11124) represents ZCWPW1 peaks overlapping DMC1 lost in *Prdm9* knockout mice.

787

788

789

790

791

792

793

794

795

796

797

798

799

800

801

802

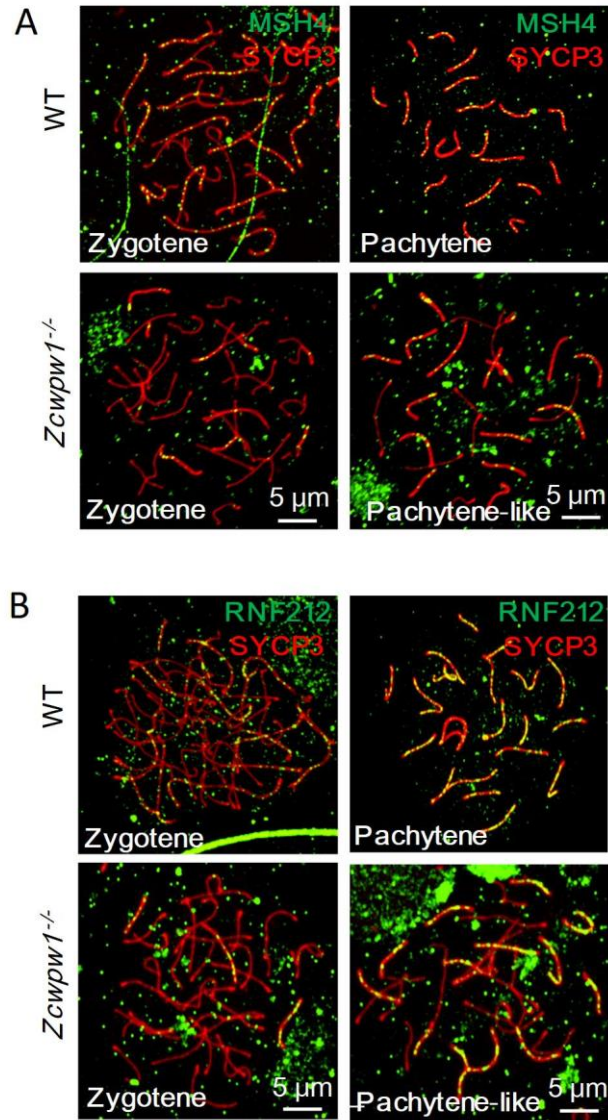

803

804

805 **Fig. 4. ZCWPW1 is required for meiotic DSB recombination**

806 (A). Chromosome spreads of spermatocytes from the testis of PD60 WT and *Zcwpw1*<sup>-/-</sup> males

807 immunostained for the recombination factor MSH4 (green) and the SC marker SYCP3 (red). (B).

808 Chromosome spreads of spermatocytes from WT and *Zcwpw1*<sup>-/-</sup> males immunostained for the

809 recombination factor RNF212 (green) and the SC marker SYCP3 (red). Representative images are

810 shown for spermatocytes at the zygotene, pachytene, and pachytene-like stages of the two genotypes.

811

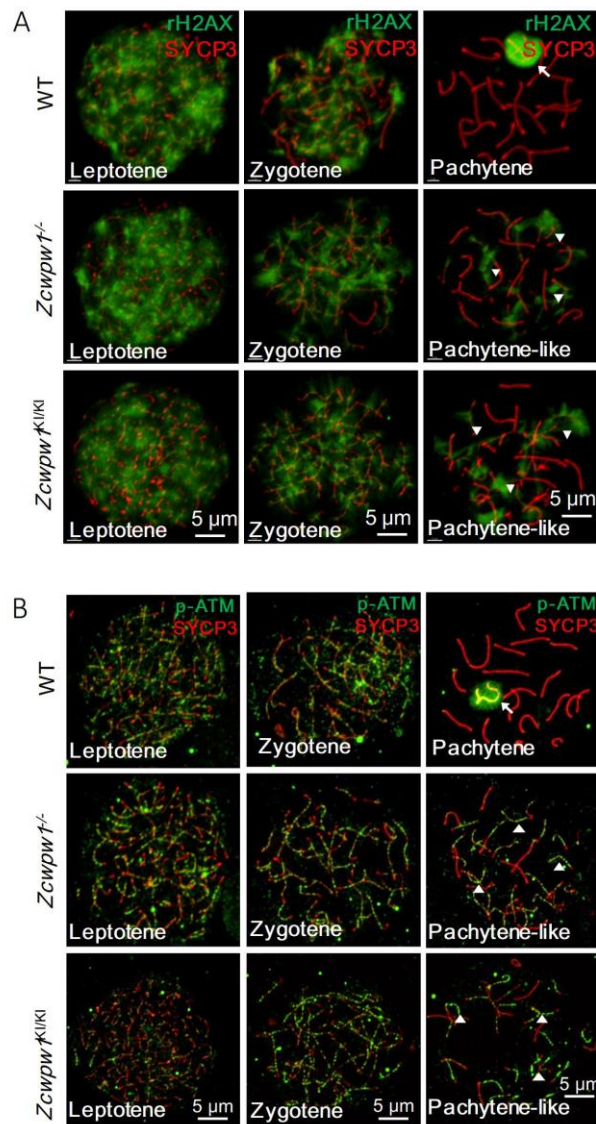

812

813

814 **Fig. 5. ZCWPW1 is required for meiotic DSB repair**

815 **(A).** Chromosome spreads of spermatocytes from the testis of PD60 WT, *Zcwpw1*<sup>-/-</sup>, and *Zcwpw1*<sup>KI/KI</sup>

816 males immunostained for the DSB marker  $\gamma$ H2AX (green) and the SC marker SYCP3 (red). **(B).**

817 Chromosome spreads of spermatocytes from the testis of PD60 WT, *Zcwpw1*<sup>-/-</sup>, and *Zcwpw1*<sup>KI/KI</sup> males

818 immunostained for the DSB repair protein p-ATM (green) and the SC marker SYCP3 (red).

819 Representative images are shown for spermatocytes at the leptotene, zygotene, pachytene (arrow

820 indicating the XY body), and pachytene-like (arrowheads indicating the p-ATM signal) stages of the

821 three genotypes.

822

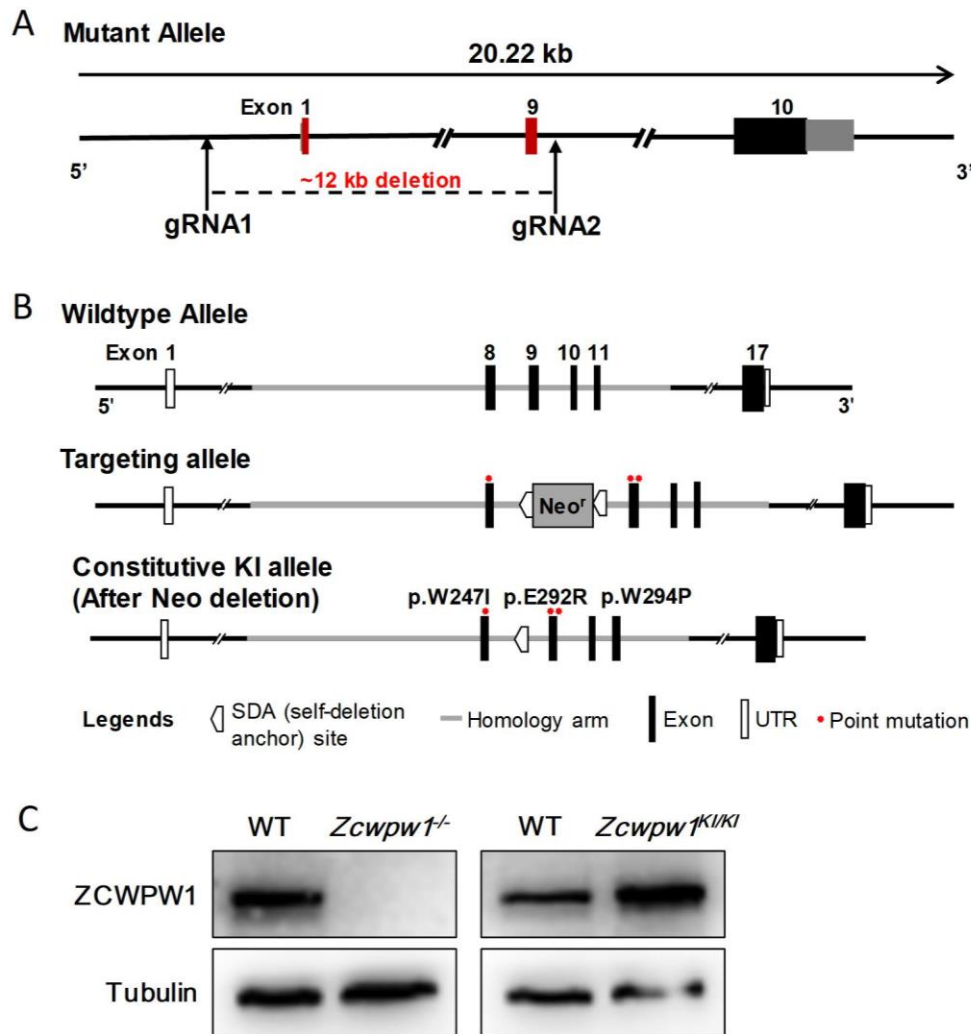

823

824

825 **Fig. S1. Generation of *Prdm9* knockout mice and *Zcwpw1* reader-dead-mutant mice**

826 (A). Schematic representation of the genome CRISP-cas9 editing strategy used to generate the *Prdm9*  
 827 knockout mice, showing the gRNAs (arrows), the corresponding coding exons (black and red thick  
 828 lines), and non-coding exons (gray thick lines). Red thick lines (coding exons) represent about 12,000  
 829 bp deleted from the wild-type *Prdm9* allele. (B). Schematic representation of the genome editing  
 830 strategy to generate the knock-in *Zcwpw1* reader-dead-mutant mice. (C). Western blotting showed that  
 831 ZCWPW1 was not detected in PD20 *Zcwpw1*<sup>-/-</sup> testes but was present in wild type testes, and there  
 832 was a similarly intense signal for *Zcwpw1*<sup>KI/KI</sup>. Tubulin was used as the loading control.

833



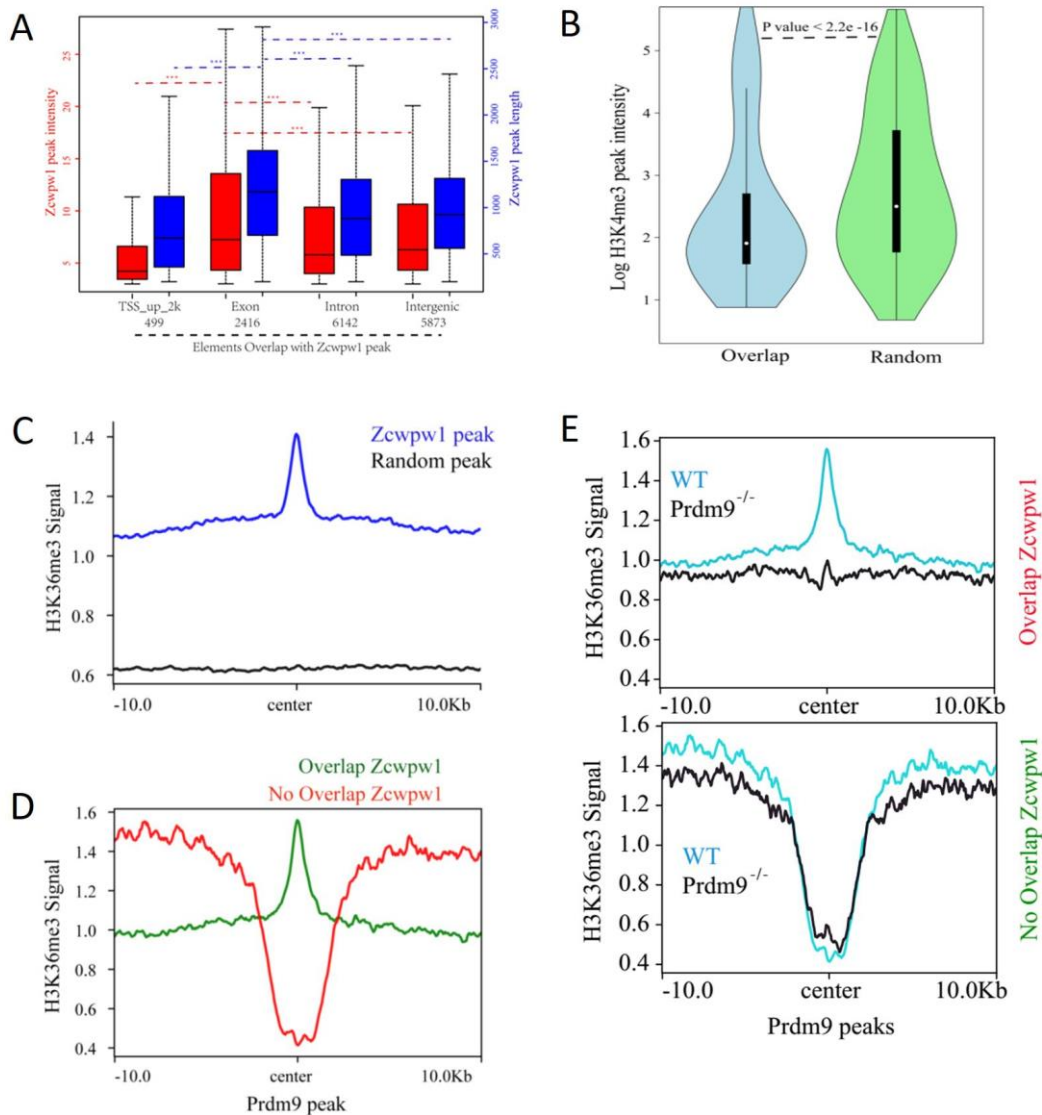

834

835

836 **Fig. S2. Correlations between ZCWPW1 peaks and H3K4me3 and H3K36me3 peaks**

837 (A). The distribution of ZCWPW1 peak intensity and peak length for the whole genome. (B). A  
 838 comparison of the H3K4me3 peak intensity between the peaks overlapping ZCWPW1 (5607 peaks)  
 839 and other, randomly selected H3K4me3 peaks (5607). P value was calculated by Mann-Whitney U test.  
 840 (C). Profile plot to show H3K36me3 signal in ZCWPW1 peaks and random peaks. The plot showed  
 841 the average values over the 10-kbp interval for all the ZCWPW1 peaks. (D). Profile plot to show  
 842 H3K36me3 signal in Prdm9 peaks overlapping with Zcwpw1 or without overlapping with ZCWPW1.  
 843 (E). Profile plot to show H3K36me3 signal in PRDM9 peaks overlapping with ZCWPW1 or without  
 844 overlapping with ZCWPW1 in wild type and *Prdm9*<sup>-/-</sup> mice.

845

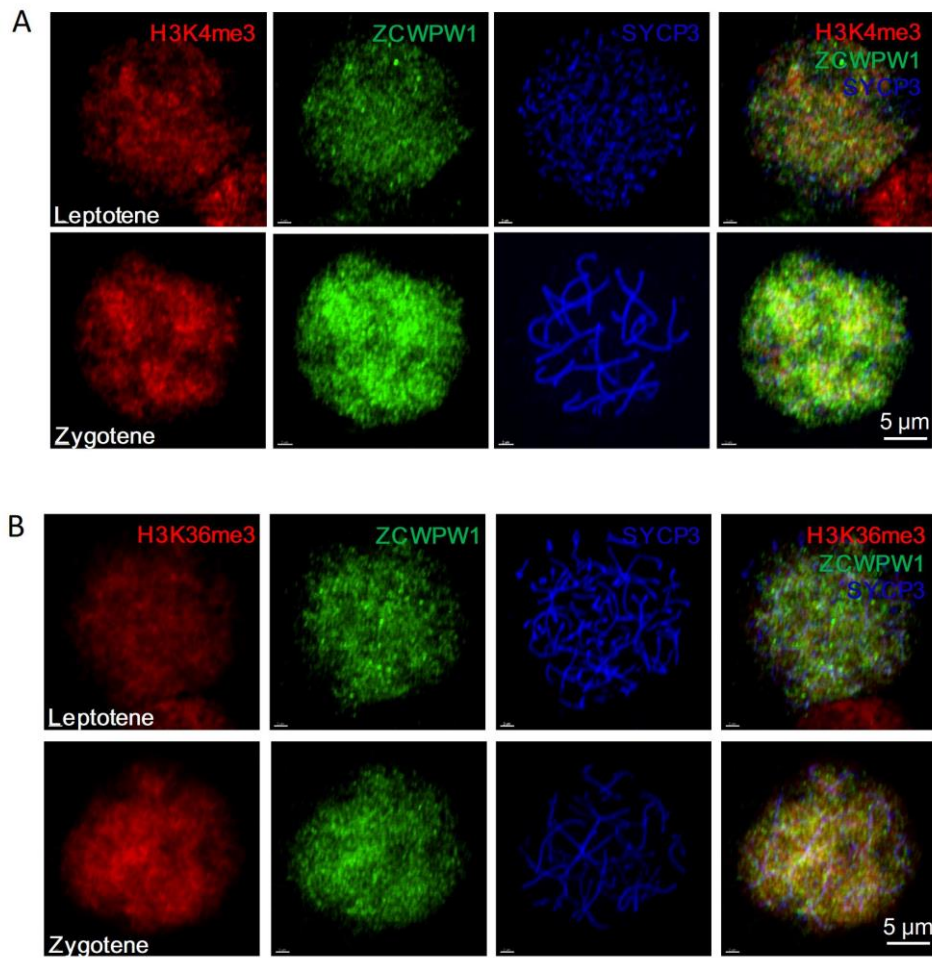

846

847

848 **Fig. S3. ZCWPW1 binding peaks correlated with the H3K36me3 peaks at the genome-wide scale**

849 **(A).** Chromosome spreads of spermatocytes from the testes of PD60 wild type were immunostained for

850 H3K4me3 (red), ZCWPW1 (green), and SYCP3 (blue). Representative images of spermatocytes at

851 leptotene and zygotene stages are shown. **(B).** Chromosome spreads of spermatocytes from the testes

852 of PD60 wild type were immunostained for H3K36me3 (red), ZCWPW1 (green), and SYCP3 (blue).

853 Representative images of spermatocytes at leptotene (upper panels) and zygotene (lower panels) stages

854 are shown.

855

856

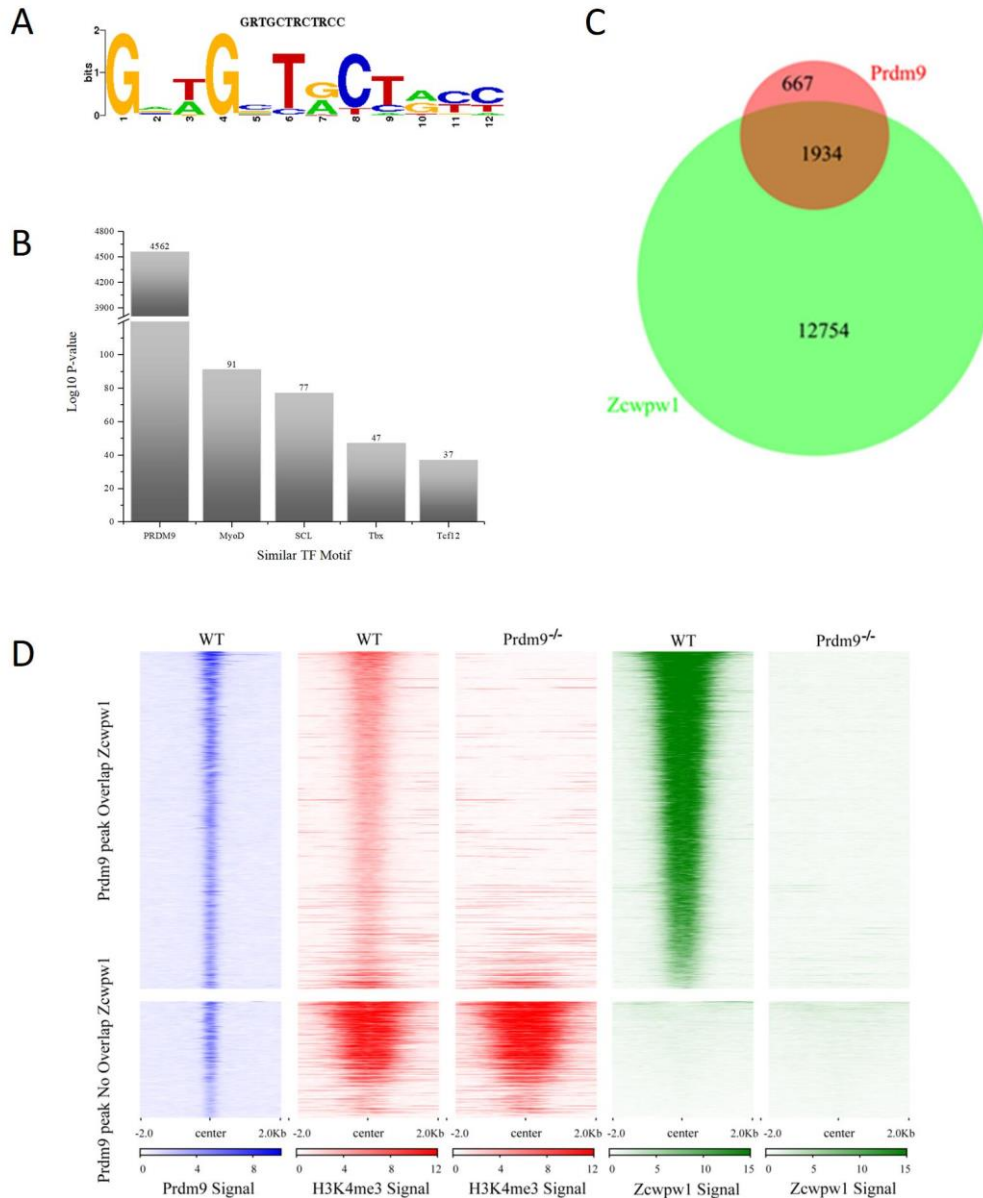

857

858

859 **Fig. S4 Correlation between ZCWPW1 chromatin occupancy and PRDM9-induced histone**  
860 **methylation**

861 **(A).** The *de novo* binding motif of ZCWPW1. **(B).** The similarity of this ZCWPW1 binding motif with  
862 those of other transcription factors. **(C)** Venn diagram (upper panel) showed the overlap of PRDM9  
863 ChIP-seencing peaks and ZCWPW1 ChIP-seencing peaks in C57BL/6 mice. **(D).** The heatmap to  
864 show H3K4me3 and ZCWPW1 peaks change following *Prdm9* knockout.

865

866

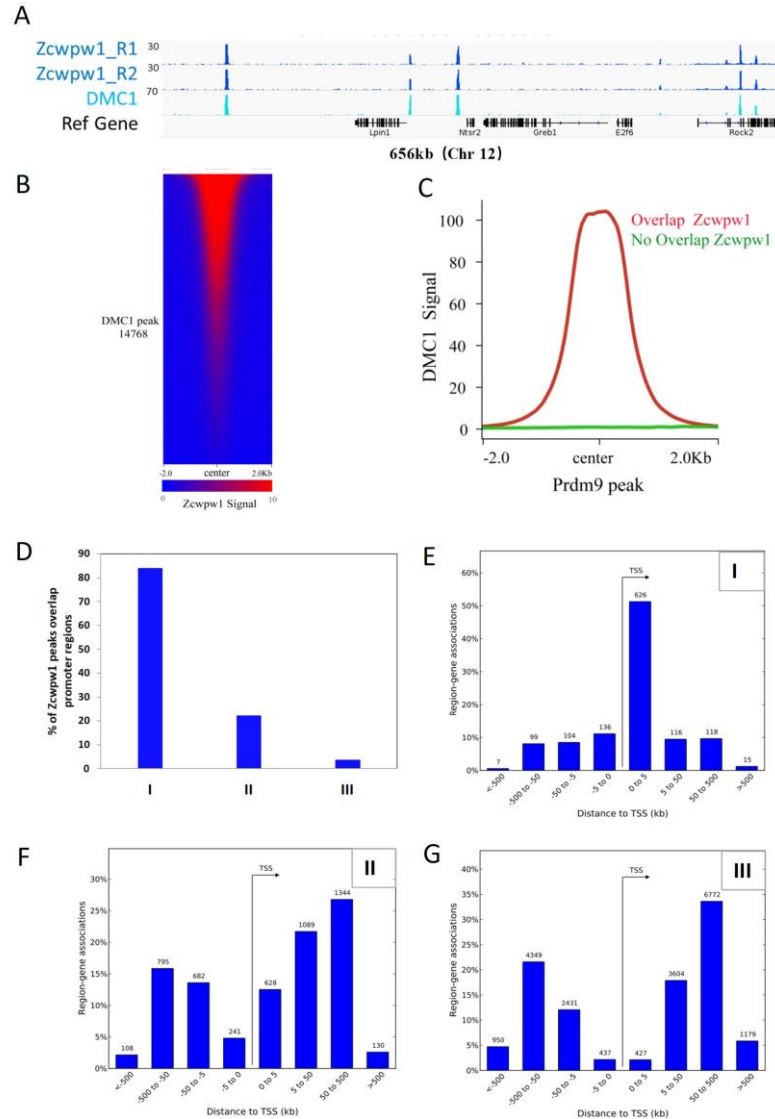

867

868

869 **Fig. S5 Correlation between the chromatin occupancy of ZCWPW1 and DMC1**

870 (A). Genome snapshot to show ZCWPW1 and DMC1 peak co-localization in C57BL/6 mice along a

871 657-kb-long region of Chromosome 12. (B). Heatmap of the ZCWPW1 signal among the DMC1 peaks.

872 (C). The profile plot showed the DMC1 signal in PRDM9 ChIP-sequencing peaks overlapping with

873 ZCWPW1 or without overlapping with ZCWPW1. (D). The percentage of ZCWPW1 peaks

874 overlapping with gene promoter regions in group I, II, III, details in Fig. 3B-C. (E-G). The distance of

875 ZCWPW1 peaks in group I, II, III from protein coding genes within a 1000 kb region.

876

877

878

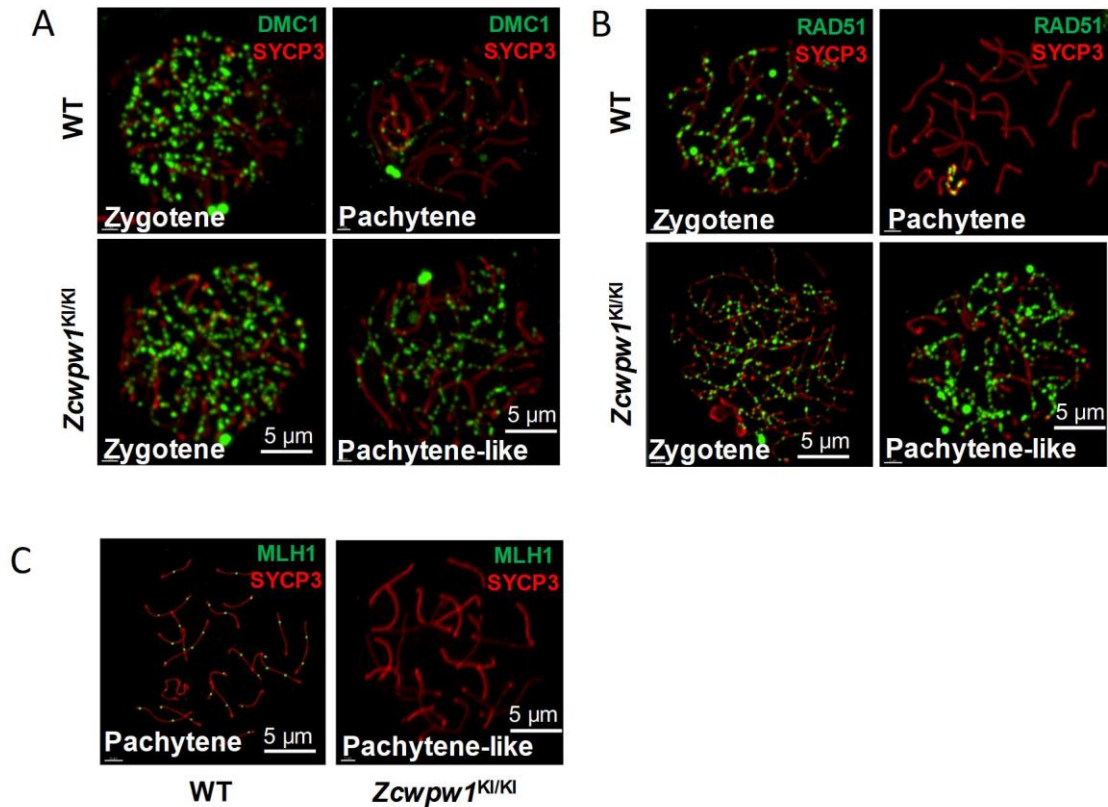

879

880

881 **Fig. S6 Meiotic recombination defects in *Zcwpw1* knock-in mice**

882 (A). Chromosome spreads of spermatocytes from the testis of PD70 WT and *Zcwpw1*<sup>KI/KI</sup> males were  
883 immunostained for DMC1 (green) and SYCP3 (red). (B). Chromosome spreads of spermatocytes from  
884 the testis of PD70 WT and *Zcwpw1*<sup>KI/KI</sup> males were immunostained for RAD51 (green) and SYCP3  
885 (red). Representative images of spermatocytes at zygotene, pachytene in WT and zygotene, pachytene-  
886 like stages in *Zcwpw1*<sup>KI/KI</sup> are shown. (C). Chromosome spreads of spermatocytes from the testis of  
887 PD60 WT and *Zcwpw1*<sup>KI/KI</sup> males were immunostained for MLH1 (green) and SYCP3 (red).  
888 Representative images of spermatocytes at pachytene in WT and pachytene-like stages in *Zcwpw1*<sup>KI/KI</sup>  
889 are shown.
